# Supplementary material for: The Role of Surgery in Global Health: Analysis of United States Inpatient Procedure Frequency by Condition Using the Global Burden of Disease 2010 Framework
Source: PubMed Central journal article supplement (PMC3935922; doi:10.1371/journal.pone.0089693), 2014-02-26
Supplement: pone.0089693.s002.pdf [file pone.0089693.s002.pdf]

Appendix S2. AHRQ ICD-9 Procedure Codes.

|                                        |                               |
|----------------------------------------|-------------------------------|
| 0044 PROC-VESSEL BIFURCATION OCT06-    | 0201 LINEAR CRANIECTOMY       |
| 0050 IMPL CRT PACEMAKER SYS            | 0202 ELEVATE SKULL FX FRAGMNT |
| 0051 IMPL CRT DEFIBRILLAT SYS          | 0203 SKULL FLAP FORMATION     |
| 0052 IMP/REP LEAD LF VEN SYS           | 0204 BONE GRAFT TO SKULL      |
| 0053 IMP/REP CRT PACEMAKR GEN          | 0205 SKULL PLATE INSERTION    |
| 0054 IMP/REP CRT DEFIB GENAT           | 0206 CRANIAL OSTEOPLASTY NEC  |
| 0056 INS/REP IMPL SENSOR LEAD OCT06-   | 0207 SKULL PLATE REMOVAL      |
| 0057 IMP/REP SUBCUE CARD DEV OCT06-    | 0211 SIMPLE SUTURE OF DURA    |
| 0061 PERC ANGIO PRECEREB VES (OCT 04)  | 0212 BRAIN MENINGE REPAIR NEC |
| 0062 PERC ANGIO INTRACRAN VES (OCT 04) | 0213 MENINGE VESSEL LIGATION  |
| 0066 PTCA OR CORONARY ATHER OCT05-     | 0214 CHOROID PLEXECTOMY       |
| 0070 REV HIP REPL-ACETAB/FEM OCT05-    | 022 VENTRICULOSTOMY           |
| 0071 REV HIP REPL-ACETAB COMP OCT05-   | 0231 VENTRICL SHUNT-HEAD/NECK |
| 0072 REV HIP REPL-FEM COMP OCT05-      | 0232 VENTRI SHUNT-CIRCULA SYS |
| 0073 REV HIP REPL-LINER/HEAD OCT05-    | 0233 VENTRICL SHUNT-THORAX    |
| 0074 HIP REPL SURF-METAL/POLY OCT05-   | 0234 VENTRICL SHUNT-ABDOMEN   |
| 0075 HIP REP SURF-METAL/METAL OCT05-   | 0235 VENTRI SHUNT-UNINARY SYS |
| 0076 HIP REP SURF-CERMC/CERMC OCT05-   | 0239 OTHER VENTRICULAR SHUNT  |
| 0077 HIP REPL SURF-CERMC/POLY OCT06-   | 0242 REPLACE VENTRICLE SHUNT  |
| 0080 REV KNEE REPLACEMT-TOTAL OCT05-   | 0243 REMOVE VENTRICLE SHUNT   |
| 0081 REV KNEE REPL-TIBIA COMP OCT05-   | 0291 LYSIS CORTICAL ADHESION  |
| 0082 REV KNEE REPL-FEMUR COMP OCT05-   | 0292 BRAIN REPAIR             |
| 0083 REV KNEE REPLACE-PATELLA OCT05-   | 0293 IMPLANT BRAIN STIMULATOR |
| 0084 REV KNEE REPL-TIBIA LIN OCT05-    | 0294 INSERT/REPLAC SKULL TONG |
| 0085 RESRF HIPTOTAL-ACET/FEM OCT06-    | 0299 SKULL & BRAIN OP NEC     |
| 0086 RESRF HIPPART-FEM HEAD OCT06-     | 0301 REMOVAL FB SPINAL CANAL  |
| 0087 RESRF HIPPART-ACETABLUM OCT06-    | 0302 REOPEN LAMINECTOMY SITE  |
| 0112 OPEN CEREB MENINGES BX            | 0309 SPINAL CANAL EXPLOR NEC  |
| 0114 OPEN BRAIN BIOPSY                 | 031 INTRASPIN NERVE ROOT DIV  |
| 0115 SKULL BIOPSY                      | 0321 PERCUTANEOUS CHORDOTOMY  |
| 0118 OTHER BRAIN DX PROCEDURE          | 0329 OTHER CHORDOTOMY         |
| 0119 OTHER SKULL DX PROCEDURE          | 0332 SPINAL CORD/MENINGES BX  |
| 0121 CRANIAL SINUS I & D               | 0339 OTHER SPINAL DX PROC     |
| 0122 REMOV INTRACRAN STIMULAT          | 034 EXCIS SPINAL CORD LESION  |
| 0123 REOPEN CRANIOTOMY SITE            | 0351 SPINE MENINGOCELE REPAIR |
| 0124 OTHER CRANIOTOMY                  | 0352 MYELOMENINGOCEL REPAIR   |
| 0125 OTHER CRANIECTOMY                 | 0353 VERTEBRAL FX REPAIR      |
| 0126 INS CATH-CRANIAL CAVITY OCT05-    | 0359 SPINAL STRUCT REPAIR NEC |
| 0127 REM CATH-CRANIAL CAVITY OCT05-    | 036 SPINAL CORD ADHESIOLYSIS  |
| 0128 INTRACEREB CTH-BURR HOLE OCT06-   | 0371 SUBARACH-PERITON SHUNT   |
| 0131 INCISE CEREBRAL MENINGES          | 0372 SUBARACH-URETERAL SHUNT  |
| 0132 LOBOTOMY & TRACTOTOMY             | 0379 OTH SPINAL THECAL SHUNT  |
| 0139 OTHER BRAIN INCISION              | 0393 INSERT SPINAL STIMULATOR |
| 0141 THALAMUS OPERATIONS               | 0394 REMOVE SPINAL STIMULATOR |
| 0142 GLOBUS PALLIDUS OPS               | 0397 REVISE SPINE THECA SHUNT |
| 0151 EX CEREB MENINGEAL LES            | 0398 REMOVE SPINE THECA SHUNT |
| 0152 HEMISPHERECTOMY                   | 0399 SPINE CANAL STRUC OP NEC |
| 0153 BRAIN LOBECTOMY                   | 0401 EXCISION ACOUSTC NEUROMA |
| 0159 OTHER BRAIN EXCISION              | 0402 TRIGEMINAL NERV DIVISION |

|                               |                               |
|-------------------------------|-------------------------------|
| 016 EXCISE SKULL LESION       | 0403 PERIPH NERVE DIV NEC     |
| 0404 PERIPH NERVE INCIS NEC   | 0681 TOTAL PARATHYROIDECTOMY  |
| 0405 GASSERIAN GANGLIONECTOMY | 0689 OTHER PARATHYROIDECTOMY  |
| 0406 PERIPH GANGLIONECT NEC   | 0691 THYROID ISTHMUS DIVISION |
| 0407 PERIPH NERV EXCISION NEC | 0692 THYROID VESSEL LIGATION  |
| 0412 OPEN PERIPH NERVE BIOPSY | 0693 THYROID SUTURE           |
| 0419 PERIPH NERVE DX PROC NEC | 0694 THYROID REIMPLANTATION   |
| 043 PERIPHERAL NERVE SUTURE   | 0695 PARATHYROID REIMPLANT    |
| 0441 DECOMPRESS TRIGEM ROOT   | 0698 OTHER THYROID OPERATIONS |
| 0442 CRAN NERV ROOT DECOM NEC | 0699 OTHER PARATHYROID OPS    |
| 0443 CARPAL TUNNEL RELEASE    | 0700 ADRENAL EXPLORATION NOS  |
| 0444 TARSAL TUNNEL RELEASE    | 0701 UNILAT ADRENAL EXPLORAT  |
| 0449 PER NERVE ADHESIOLYS NEC | 0702 BILAT ADRENAL EXPLORAT   |
| 045 PERIPHERAL NERVE GRAFT    | 0712 OPEN ADRENAL GLAND BX    |
| 046 PERIPH NERVE TRANSPOSIT   | 0713 TRANSFRONT PITUITARY BX  |
| 0471 HYPOGLOSS-FACIAL ANASTOM | 0714 TRANSPHEN PITUITARY BX   |
| 0472 ACCESSORY-FACIAL ANASTOM | 0715 PITUITARY BIOPSY NOS     |
| 0473 ACCESS-HYPOGLOSS ANASTOM | 0716 THYMUS BIOPSY            |
| 0474 PERIPH NERV ANASTOM NEC  | 0717 PINEAL BIOPSY            |
| 0475 POSTOP REVIS PER NERV OP | 0719 ENDOCRINE DX PROC NEC    |
| 0476 LATE REPAIR PER NERV INJ | 0721 ADRENAL LESION EXCISION  |
| 0479 OTHER NEUROPLASTY        | 0722 UNILATERAL ADRENALECTOMY |
| 0491 NEURECTASIS              | 0729 PART ADRENALECTOMY NEC   |
| 0492 IMPLANT PERIPH STIMULAT  | 073 BILATERAL ADRENALECTOMY   |
| 0493 REMOVE PERIPH STIMULATOR | 0741 ADRENAL INCISION         |
| 0499 PERIPHERAL NERVE OPS NEC | 0742 ADRENAL NERVE DIVISION   |
| 050 SYMPATH NERVE DIVISION    | 0743 ADRENAL VESSEL LIGATION  |
| 0511 SYMPATHETIC NERVE BIOPSY | 0744 ADRENAL REPAIR           |
| 0519 SYMPATH NRV DX PROC NEC  | 0745 ADRENAL REIMPLANTATION   |
| 0521 SPHENOPALATIN GANGLIONEC | 0749 ADRENAL OPERATION NEC    |
| 0522 CERVICAL SYMPATHECTOMY   | 0751 PINEAL FIELD EXPLORATION |
| 0523 LUMBAR SYMPATHECTOMY     | 0752 PINEAL GLAND INCISION    |
| 0524 PRESACRAL SYMPATHECTOMY  | 0753 PARTIAL PINEALECTOMY     |
| 0525 PERIART SYMPATHECTOMY    | 0754 TOTAL PINEALECTOMY       |
| 0529 OTHER SYMPATHECTOMY      | 0759 PINEAL OPERATION NEC     |
| 0581 SYMPATHETIC NERVE REPAIR | 0761 EXC PITUIT LES-TRANSFRON |
| 0589 SYMPATHETIC NERVE OP NEC | 0762 EXC PITUIT LES-TRANSPHEN |
| 059 OTHER NERVOUS SYSTEM OPS  | 0763 PART EXCIS PITUITARY NOS |
| 0602 REOPEN THYROID FIELD WND | 0764 TOT EXC PITUIT-TRANSFRON |
| 0609 INCIS THYROID FIELD NEC  | 0765 TOT EXC PITUIT-TRANSPHEN |
| 0612 OPEN THYROID GLAND BX    | 0768 TOTAL EXC PITUITARY NEC  |
| 0613 PARATHYROID BIOPSY       | 0769 TOTAL EXC PITUITARY NOS  |
| 0619 THYR/PARATHY DX PROC NEC | 0771 PITUITARY FOSSA EXPLORAT |
| 062 UNILAT THYROID LOBECTOMY  | 0772 PITUITARY GLAND INCISION |
| 0631 EXCISION THYROID LESION  | 0779 PITUITARY OPERATION NEC  |
| 0639 PART THYROIDECTOMY NEC   | 0780 THYMECTOMY NOS           |
| 064 COMPLETE THYROIDECTOMY    | 0781 PART EXCISION OF THYMUS  |
| 0650 SUBSTERN THYROIDECT NOS  | 0782 TOTAL EXCISION OF THYMUS |
| 0651 PART SUBSTERN THYROIDECT | 0791 THYMUS FIELD EXPLORATION |
| 0652 TOT SUBSTERN THYROIDECT  | 0792 INCISION OF THYMUS       |
| 066 LINGUAL THYROID EXCISION  | 0793 REPAIR OF THYMUS         |

|                               |                               |
|-------------------------------|-------------------------------|
| 067 THYROGLOSS DUCT EXCISION  | 0794 THYMUS TRANSPLANTATION   |
| 0799 THYMUS OPERATION NEC     | 0949 LAC PASSAGE MANIP NEC    |
| 0811 EYELID BIOPSY            | 0951 LAC PUNCTUM INCISION     |
| 0820 REMOVE EYELID LESION NOS | 0952 LAC CANALICULI INCISION  |
| 0821 CHALAZION EXCISION       | 0953 LACRIMAL SAC INCISION    |
| 0822 EXCISE MINOR LES LID NEC | 0959 LACRIM PASSAGE INCIS NEC |
| 0823 EXC MAJ LES LID PRT-THIC | 096 LACRIM SAC/PASSAGE EXCIS  |
| 0824 EXC MAJ LES LID FUL-THIC | 0971 CORRECT EVERTED PUNCTUM  |
| 0825 DESTRUCTION LID LESION   | 0972 PUNCTUM REPAIR NEC       |
| 0831 PTOSIS REP-FRONT MUS SUT | 0973 CANALICULUS REPAIR       |
| 0832 PTOSIS REP-FRON MUS SLNG | 0981 DACRYOCYSTORHINOSTOMY    |
| 0833 PTOSIS REP-LEVAT MUS ADV | 0982 CONJUNCTIVOCYSTORHINOST  |
| 0834 PTOSIS REP-LEVAT MUS NEC | 0983 CONJUNCTIVORHINOS W TUBE |
| 0835 PTOS REP-TARSAL TECHNIQ  | 0991 LAC PUNCTUM OBLITERATION |
| 0836 BLEPHAROPTOS REPAIR NEC  | 0999 LACRIMAL SYSTEM OP NEC   |
| 0837 REDUC OVERCORRECT PTOSIS | 100 INCISE/REMOV CONJUNCT FB  |
| 0838 CORRECT LID RETRACTION   | 101 CONJUNCTIVA INCISION NEC  |
| 0841 THERMOCAUT/ENTROPION REP | 1021 CONJUNCTIVAL BIOPSY      |
| 0842 SUTURE ENTROPION REPAIR  | 1029 CONJUNCTIVA DX PROC NEC  |
| 0843 WEDG RESEC ENTROPION REP | 1031 EXCISE CONJUNCTIV LESION |
| 0844 LID RECONS ENTROPION REP | 1032 DESTRUCT CONJUNC LES NEC |
| 0849 ENTROPION/ECTROP REP NEC | 1033 OTH CONJUNC DESTRUC PROC |
| 0851 CANTHOTOMY               | 1041 SYMBLEPH REP W FREE GRFT |
| 0852 BLEPHARORRHAPHY          | 1042 GRAFT CONJUNC CUL-DE-SAC |
| 0859 ADJUST LID POSITION NEC  | 1043 CONJUN CUL-DE-SAC RX NEC |
| 0861 LID RECONST W SKIN GRAFT | 1044 CONJUNC FREE GRAFT NEC   |
| 0862 LID RECONST W MUC GRAFT  | 1049 CONJUNCTIVOPLASTY NEC    |
| 0863 LID RECONST W HAIR GRAFT | 105 CONJUNC/LID ADHESIOLYSIS  |
| 0864 LID RECON-TARSOCONJ FLAP | 106 REPAIR CONJUNCT LACERAT   |
| 0869 LID RECONSTR W GRAFT NEC | 1091 SUBCONJUNCTIVAL INJECT   |
| 0870 LID RECONSTRUCTION NOS   | 1099 CONJUNCTIVAL OP NEC      |
| 0871 LID MARG RECON-PART THIC | 110 MAGNET REMOVAL CORNEA FB  |
| 0872 LID RECONS-PART THIC NEC | 111 CORNEAL INCISION          |
| 0873 LID MARG RECONS FUL THIC | 1121 CORNEAL SCRAPE FOR SMEAR |
| 0874 LID RECONST-FUL THIC NEC | 1122 CORNEAL BIOPSY           |
| 0891 ELECTROSURG LID EPILAT   | 1129 CORNEAL DX PROC NEC      |
| 0892 CRYOSURG LID EPILATION   | 1131 PTERYGIUM TRANSPOSITION  |
| 0893 EYELID EPILATION NEC     | 1132 PTERYG EXC W CORNEA GRFT |
| 0899 EYELID OPERATION NEC     | 1139 PTERYGIUM EXCISION NEC   |
| 090 LACRIMAL GLAND INCISION   | 1141 MECH REMOV CORNEA EPITH  |
| 0911 LACRIMAL GLAND BIOPSY    | 1142 THERMOCAUT CORNEA LESION |
| 0912 LACRIMAL SAC BIOPSY      | 1143 CRYOTHERAP CORNEA LESION |
| 0919 LACRIMAL SYS DX PROC NEC | 1149 DESTRUCT CORNEA LES NEC  |
| 0920 EXC LACRIMAL GLAND NOS   | 1151 SUTURE CORNEA LACERATION |
| 0921 EXCIS LES LACRIMAL GLAND | 1152 REP CORNEA POSTOP DEHISC |
| 0922 PART DACRYOADENECT NEC   | 1153 RX CORNEA LAC W CONJ FLP |
| 0923 TOTAL DACRYOADENECTOMY   | 1159 CORNEAL REPAIR NEC       |
| 093 OTHER LACRIMAL GLAND OPS  | 1160 CORNEAL TRANSPLANT NOS   |
| 0941 LACRIMAL PUNCTUM PROBE   | 1161 LAM KERATPLAST W AUTGRFT |
| 0942 LAC CANALICULI PROBE     | 1162 LAMELLAR KERATOPLAST NEC |
| 0943 NASOLACRIMAL DUCT PROBE  | 1163 PERF KERATOPL W AUTOGRFT |

|                               |                                     |
|-------------------------------|-------------------------------------|
| 0944 NASOLAC DUCT INTUBAT     | 1164 PERFORAT KERATOPLAST NEC       |
| 1169 CORNEAL TRANSPLANT NEC   | 1282 SCLERAL FISTULA REPAIR         |
| 1171 KERATOMILEUSIS           | 1283 REVIS ANT SEG OP WND NEC       |
| 1172 KERATOPHAKIA             | 1284 DESTRUCT SCLERAL LESION        |
| 1173 KERATOPROSTHESIS         | 1285 REPAIR STAPHYLOM W GRAFT       |
| 1174 THERMOKERATOPLASTY       | 1286 REP SCLER STAPHYLOMA NEC       |
| 1175 RADIAL KERATOTOMY        | 1287 GRAFT REINFORCE SCLERA         |
| 1176 EPIKERATOPHAKIA          | 1288 SCLERA REINFORCEMENT NEC       |
| 1179 CORNEA RECONSTRUCT NEC   | 1289 SCLERAL OPERATION NEC          |
| 1191 CORNEAL TATTOOING        | 1291 THERAPEUT EVAC ANT CHAMB       |
| 1192 REMOVE CORNEAL IMPLANT   | 1292 ANTERIOR CHAMBER INJECT        |
| 1199 CORNEAL OPERATION NEC    | 1293 REMOV EPITHEL DOWNGROWTH       |
| 1200 REMOV ANT SEGMNT FB NOS  | 1297 IRIS OPERATION NEC             |
| 1201 MAGNET REMOV ANT SEG FB  | 1298 CILIARY BODY OP NEC            |
| 1202 NONMAG REMOV ANT SEG FB  | 1299 ANTERIOR CHAMBER OP NEC        |
| 1211 IRIDOTOMY W TRANSFIXION  | 1300 REMOVE FB LENS NOS             |
| 1212 IRIDOTOMY NEC            | 1301 MAGNET REMOVE FB LENS          |
| 1213 PROLAPSED IRIS EXCISION  | 1302 NONMAGNET REMOVE FB LENS       |
| 1214 IRIDECTOMY NEC           | 1311 TEMP-INF INTRCAP LENS EX       |
| 1221 DX ASPIRAT-ANT CHAMBER   | 1319 INTRACAPSUL LENS EXT NEC       |
| 1222 IRIS BIOPSY              | 132 LINEAR EXTRACAP LENS EXT        |
| 1229 ANT SEGMENT DX PROC NEC  | 133 SIMPL ASPIR LENS EXTRACT        |
| 1231 GONIOSYNECHIAE LYSIS     | 1341 CATARAC PHACOEMULS/ASPIR       |
| 1232 ANT SYNECHIA LYSIS NEC   | 1342 POST CATARAC FRAG/ASPIR        |
| 1233 POST SYNECHIAE LYSIS     | 1343 CATARACT FRAG/ASPIR NEC        |
| 1234 CORNEOVITREAL ADHESIOLYS | 1351 TEMP-INF XTRACAP LENS EX       |
| 1235 COREOPLASTY              | 1359 EXTRACAP LENS EXTRAC NEC       |
| 1239 IRIDOPLASTY NEC          | 1361 EXTRACAP LENS EXTRAC NEC       |
| 1240 REMOV ANT SEGMNT LES NOS | 1362 EXTRACAP LENS EXTRAC NEC       |
| 1241 NONEXC DESTRUC IRIS LES  | 1363 EXTRACAP LENS EXTRAC NEC       |
| 1242 EXCISION OF IRIS LESION  | 1364 AFTER-CATAR DISCISSION         |
| 1243 NONEXC DESTR CIL BOD LES | 1365 AFTER-CATARACT EXCISION        |
| 1244 EXCISE CILIARY BODY LES  | 1366 AFTER CATAR FRAGMENTATION      |
| 1251 GONIOPUNCTURE            | 1369 CATARACT EXTRACTION NEC        |
| 1252 GONIOTOMY                | 1370 INSERT PSEUDOPHAKOS NOS        |
| 1253 GONIOTOMY W GONIOPUNCTUR | 1371 INSERT LENS AT CATAR EXT       |
| 1254 TRABECULOTOMY AB EXTERNO | 1372 SECONDARY INSERT LENS          |
| 1255 CYCLODIALYSIS            | 138 IMPLANTED LENS REMOVAL          |
| 1259 FACILIT INTRAOC CIRC NEC | 139 OTHER OPERATIONS ON LENS        |
| 1261 TREPIN SCLERA W IRIDECT  | 1390 OPERATION ON LENS NEC OCT06-   |
| 1262 THERMCAUT SCLER W IRIDEC | 1391 IMPL INTRAOC TELESC PROS OCT06 |
| 1263 IRIDENCLEISIS/IRIDOTASIS | 1400 REMOV POST SEGMNT FB NOS       |
| 1264 TRABECULECTOM AB EXTERNO | 1401 MAGNET REMOV POST SEG FB       |
| 1265 SCLER FISTULIZ W IRIDECT | 1402 NONMAG REMOV POST SEG FB       |
| 1266 POSTOP REVIS SCL FISTUL  | 1411 DIAGNOST VITREOUS ASPIR        |
| 1269 SCLER FISTULIZING OP NEC | 1419 DX PROC POST SEG NEC           |
| 1271 CYCLODIATHERMY           | 1421 CHORIORET LES DIATHERMY        |
| 1272 CYCLOCRYOTHERAPY         | 1422 CHORIORETIN LES CRYOTHER       |
| 1273 CYCLOPHOTOCOAGULATION    | 1426 CHORIORET LES RADIOOTHER       |
| 1274 CIL BODY DIMINUTION NOS  | 1427 CHORIORET LES RAD IMPLAN       |
| 1279 GLAUCOMA PROCEDURE NEC   | 1429 CHORIORET LES DESTR NEC        |

|                               |                               |
|-------------------------------|-------------------------------|
| 1281 SUTURE SCLERAL LACER     | 1431 RETINAL TEAR DIATHERMY   |
| 1432 RETINAL TEAR CRYOTHERAPY | 1664 ENUC SOCKET REVIS NEC    |
| 1439 RETINAL TEAR REPAIR NEC  | 1665 2NDRY EXENT CAVITY GRAFT |
| 1441 SCLERAL BUCKLE W IMPLANT | 1666 REVIS EXENTER CAVITY NEC |
| 1449 SCLERAL BUCKLING NEC     | 1669 2ND OP POST EYE REM NEC  |
| 1451 DETACH RETINA-DIATHERMY  | 1671 REMOVE OCULAR IMPLANT    |
| 1452 DETACH RETINA-CRYOTHERAP | 1672 REMOVE ORBITAL IMPLANT   |
| 1453 DETACH RETINA XENON COAG | 1681 REPAIR OF ORBITAL WOUND  |
| 1454 DETACH RETINA LASER COAG | 1682 REPAIR EYEBALL RUPTURE   |
| 1455 DETACH RET PHOTOCOAG NOS | 1689 EYE/ORBIT INJ REPAIR NEC |
| 1459 REPAIR RETINA DETACH NEC | 1692 EXCISION ORBITAL LESION  |
| 146 REMOV PROS MAT POST SEG   | 1693 EXCISION EYE LESION NOS  |
| 1471 ANTERIOR REMOV VITREOUS  | 1698 OPERATION ON ORBIT NEC   |
| 1472 VITREOUS REMOVAL NEC     | 1699 OPERATION ON EYEBALL NEC |
| 1473 ANTERIOR MECHAN VITRECT  | 1821 PREAURICULAR SINUS EXCIS |
| 1474 MECH VITRECTOMY NEC      | 1831 RAD EXCIS EXT EAR LES    |
| 1475 VITREOUS SUBSTITUT INJEC | 1839 EXCIS EXTERNAL EAR NEC   |
| 1479 VITREOUS OPERATION NEC   | 185 CORRECTION PROMINENT EAR  |
| 149 OTHER POST SEGMENT OPS    | 186 EXT AUDIT CANAL RECONSTR  |
| 1501 EXTRAOC MUSC-TEND BIOPSY | 1871 CONSTRUCTION EAR AURICLE |
| 1509 EXTRAOC MUSC DX PROC NEC | 1872 REATTACH AMPUTATED EAR   |
| 1511 ONE EXTRAOC MUS RECESS   | 1879 PLASTIC REP EXT EAR NEC  |
| 1512 1 EXTRAOC MUSCL ADVANCE  | 189 OTHER EXT EAR OPERATIONS  |
| 1513 1 EXTRAOC MUSCL RESECT   | 190 STAPES MOBILIZATION       |
| 1519 XTRAOC MUS OP/DETACH NEC | 1911 STAPEDECT W REPLAC INCUS |
| 1521 LENGTHEN 1 EXTRAOC MUSC  | 1919 STAPEDECTOMY NEC         |
| 1522 SHORTEN 1 EXTRAOC MUSC   | 1921 REV STAPDEC W INCUS REPL |
| 1529 OP ON 1 EXTRAOC MUSC NEC | 1929 STAPEDECTOMY REVIS NEC   |
| 153 TEMP DETACH >1 XTROC MUS  | 193 OSSICULAR CHAIN OP NEC    |
| 154 OTH OP ON >L EXTRAOC MUS  | 194 MYRINGOPLASTY             |
| 155 EXTRAOCUL MUS TRANSPOSIT  | 1952 TYPE 2 TYMPANOPLASTY     |
| 156 REVIS EXTRAOC MUSC SURG   | 1953 TYPE 3 TYMPANOPLASTY     |
| 157 EXTRAOC MUSC INJ REPAIR   | 1954 TYPE 4 TYMPANOPLASTY     |
| 159 OTH EXTRAOC MUS-TEND OP   | 1955 TYPE 5 TYMPANOPLASTY     |
| 1601 ORBITOTOMY W BONE FLAP   | 196 TYMPANOPLASTY REVISION    |
| 1602 ORBITOTOMY W IMPLANT     | 199 MIDDLE EAR REPAIR NEC     |
| 1609 ORBITOTOMY NEC           | 2001 MYRINGOTOMY W INTUBATION |
| 161 REMOVE PENETRAT FB EYE    | 2021 MASTOID INCISION         |
| 1622 DIAGNOSTIC ASP OF ORBIT  | 2022 PETRUS PYRAM AIR CEL INC |
| 1623 EYEBALL & ORBIT BIOPSY   | 2023 MIDDLE EAR INCISION      |
| 1629 EYEBAL/ORBIT DX PROC NEC | 2032 MID & INNER EAR BIOPSY   |
| 1631 EYE EVISC W SYNCH IMPLAN | 2039 MID/IN EAR DX PROC NEC   |
| 1639 EYEBALL EVISCERATION NEC | 2041 SIMPLE MASTOIDECTOMY     |
| 1641 EYE ENUC/IMPLAN/MUSC ATT | 2042 RADICAL MASTOIDECTOMY    |
| 1642 EYE ENUC W IMPLANT NEC   | 2049 MASTOIDECTOMY NEC        |
| 1649 EYEBALL ENUCLEATION NEC  | 2051 EXCISE MIDDLE EAR LESION |
| 1651 RADICAL ORBITOMAXILLECT  | 2059 MIDDLE EAR EXCISION NEC  |
| 1652 ORBIT EXENT W BONE REMOV | 2061 INNER EAR FENESTRATION   |
| 1659 ORBITAL EXENTERATION NEC | 2062 REVIS INNER EAR FENESTRA |
| 1661 2NDRY OCULAR IMP INSERT  | 2071 ENDOLYMPHATIC SHUNT      |
| 1662 REVIS/REINSERT OCUL IMP  | 2072 INNER EAR INJECTION      |

|                               |                               |
|-------------------------------|-------------------------------|
| 1663 REVIS ENUC SOCKET W GRFT | 2079 INC/EXC/DESTR IN EAR NEC |
| 2091 TYMPANOSYMPATHECTOMY     | 253 COMPLETE GLOSSECTOMY      |
| 2092 MASTOIDECTOMY REVISION   | 254 RADICAL GLOSSECTOMY       |
| 2093 REPAIR OVAL/ROUND WINDOW | 2559 REPAIR OF TONGUE NEC     |
| 2095 ELECMAG HEAR DEV IMPLANT | 2594 OTHER GLOSSOTOMY         |
| 2096 IMPLT COCHLEAR PROST NOS | 2599 TONGUE OPERATION NEC     |
| 2097 IMP/REP SCHAN COCH PROS  | 2612 OPEN BX SALIV GLAND/DUCT |
| 2098 IMP/REP MCHAN COCHL PROS | 2621 SALIVARY CYST MARSUPIAL  |
| 2099 MID-INNER EAR OPS NEC    | 2629 SALIV LESION EXCIS NEC   |
| 2104 ETHMOID ART LIGAT-EPIST  | 2630 SIALOADENECTOMY NOS      |
| 2105 MAX ART LIG FOR EPISTAX  | 2631 PARTIAL SIALOADENECTOMY  |
| 2106 EXT CAROT ART LIG-EPIST  | 2632 COMPLETE SIALOADENECTOMY |
| 2107 NASAL SEPT GRFT-EPISTAX  | 2641 SUTURE OF SALIV GLND LAC |
| 2109 EPISTAXIS CONTROL NEC    | 2642 SALIVARY FISTULA CLOSURE |
| 214 RESECTION OF NOSE         | 2649 SALIVARY REPAIR NEC      |
| 215 SUBMUC NASAL SEPT RESECT  | 2699 SALIVARY OPERATION NEC   |
| 2161 DIATHER/CRYO TURBINECTOM | 270 DRAIN FACE & MOUTH FLOOR  |
| 2162 TURBINATE FRACTURE       | 271 INCISION OF PALATE        |
| 2169 TURBINECTOMY NEC         | 2721 BONY PALATE BIOPSY       |
| 2172 OPEN REDUCTION NASAL FX  | 2722 UVULA AND SOFT PALATE BX |
| 2182 NASAL FISTULA CLOSURE    | 2731 LOC EXC BONY PALATE LES  |
| 2183 TOT NASAL RECONSTRUCTION | 2732 WIDE EXC BONY PALATE LES |
| 2184 REVISION RHINOPLASTY     | 2742 WIDE EXCISION OF LIP LES |
| 2185 AUGMENTATION RHINOPLASTY | 2743 EXCISION OF LIP LES NEC  |
| 2186 LIMITED RHINOPLASTY      | 2749 EXCISION OF MOUTH NEC    |
| 2187 RHINOPLASTY NEC          | 2753 CLOSURE OF MOUTH FISTULA |
| 2188 SEPTOPLASTY NEC          | 2754 REPAIR OF CLEFT LIP      |
| 2189 NASAL REPAIR NEC         | 2755 FULL-THICK GRFT TO MOUTH |
| 2199 NASAL OPERATION NEC      | 2756 SKIN GRAFT TO MOUTH NEC  |
| 2212 OPEN BIOPSY NASAL SINUS  | 2757 PEDICLE ATTACH TO MOUTH  |
| 2231 RADICAL MAXILLARY ANTROT | 2759 MOUTH REPAIR NEC         |
| 2239 EXT MAXILLARY ANTROT NEC | 2761 SUTURE OF PALATE LACERAT |
| 2241 FRONTAL SINUSOTOMY       | 2762 CLEFT PALATE CORRECTION  |
| 2242 FRONTAL SINUSECTOMY      | 2763 REVIS CLEFT PALAT REPAIR |
| 2250 SINUSOTOMY NOS           | 2769 OTH PLASTIC REPAIR PALAT |
| 2251 ETHMOIDOTOMY             | 2771 INCISION OF UVULA        |
| 2252 SPHENOIDOTOMY            | 2772 EXCISION OF UVULA        |
| 2253 MULTIPLE SINUS INCISION  | 2773 REPAIR OF UVULA          |
| 2260 SINUSECTOMY NOS          | 2779 OTHER UVULA OPERATIONS   |
| 2261 C-LUC EXC MAX SINUS LES  | 2792 MOUTH INCISION NOS       |
| 2262 EXC MAX SINUS LESION NEC | 2799 ORAL CAVITY OPS NEC      |
| 2263 ETHMOIDECTOMY            | 280 PERITONSILLAR I & D       |
| 2264 SPHENOIDECTOMY           | 2811 TONSIL&ADENOID BIOPSY    |
| 2271 NASAL SINUS FISTULA CLOS | 2819 TONSIL&ADENOID DX OP NEC |
| 2279 NASAL SINUS REPAIR NEC   | 282 TONSILLECTOMY             |
| 229 OTHER NASAL SINUS OPS     | 283 TONSILLECTOMY/ADENOIDEC   |
| 242 GINGIVOPLASTY             | 284 EXCISION OF TONSIL TAG    |
| 244 EXC OF DENTAL LES OF JAW  | 285 EXCISION LINGUAL TONSIL   |
| 245 ALVEOLOPLASTY             | 286 ADENOIDECTOMY             |
| 2502 OPEN BIOPSY OF TONGUE    | 287 HEMORR CONTRL POST T & A  |
| 251 DESTRUCTION TONGUE LES    | 2891 INCIS TO REMOV TONSIL FB |

|                                      |                                     |
|--------------------------------------|-------------------------------------|
| 252 PARTIAL GLOSSECTOMY              | 2892 EXCIS TONSIL/ADENOID LES       |
| 2899 TONSIL/ADENOID OPS NEC          | 3225 THOR ABLTN LUNG LES/TISS OCT06 |
| 290 PHARYNGOTOMY                     | 3226 ABLTN LUNG TISS NEC/NOS OCT06- |
| 292 EXC BRANCHIAL CLEFT CYST         | 3229 DESTROY LOC LUNG LES NEC       |
| 293 EXC BRANCHIAL CLEFT CYST         | 323 SEGMENTAL LUNG RESECTION        |
| 2931 CRICOPHARYNGEAL MYOTOMY         | 324 LOBECTOMY OF LUNG               |
| 2932 PHARYNGEAL DIVERTICULEC         | 325 COMPLETE PNEUMONECTOMY          |
| 2933 PHARYNGECTOMY                   | 326 RAD DISSEC THORAC STRUCT        |
| 2939 EXCIS/DESTR LES PHAR NEC        | 329 OTHER EXCISION OF LUNG          |
| 294 PLASTIC OP ON PHARYNX            | 330 INCISION OF BRONCHUS            |
| 2951 SUTURE OF PHARYNGEAL LAC        | 331 INCISION OF LUNG                |
| 2952 CLOS BRANCH CLEFT FISTUL        | 3325 OPEN BRONCHIAL BIOPSY          |
| 2953 CLOS PHARYNX FISTULA NEC        | 3327 CLOS ENDOSCOPIC LUNG BX        |
| 2954 LYSIS PHARYNGEAL ADHES          | 3328 OPEN LUNG BIOPSY               |
| 2959 PHARYNGEAL REPAIR NEC           | 3329 BRONCH/LUNG DX PROC NEC        |
| 2992 DIVIS GLOSSOPHARYNG NERV        | 3334 THORACOPLASTY                  |
| 2999 PHARYNGEAL OPERATION NEC        | 3339 SURG COLLAPS OF LUNG NEC       |
| 3001 LARYNX CYST MARSUPIALIZ         | 3341 BRONCHIAL LACERAT SUTURE       |
| 3009 DESTRUCT LARYNX LES NEC         | 3342 BRONCHIAL FISTULA CLOS         |
| 301 HEMILARYNGECTOMY                 | 3343 LUNG LACERATION CLOSURE        |
| 3021 EPIGLOTTIDECTOMY                | 3348 BRONCHIAL REPAIR NEC           |
| 3022 VOCAL CORDECTOMY                | 3349 LUNG REPAIR NEC                |
| 3029 OTHER PART LARYNGECTOMY         | 335 LUNG REPAIR NEC                 |
| 303 COMPLETE LARYNGECTOMY            | 3350 LUNG TRANSPLANT NOS            |
| 304 RADICAL LARYNGECTOMY             | 3351 UNILAT LUNG TRANSPLANT         |
| 3121 MEDIASTINAL TRACHEOSTOMY        | 3352 BILAT LUNG TRANSPLANT          |
| 3129 OTHER PERM TRACHEOSTOMY         | 336 COMB HEART/LUNG TRANSPLA        |
| 313 INCIS LARYNX TRACHEA NEC         | 3392 BRONCHIAL LIGATION             |
| 3145 OPN BX LARYNX OR TRACHEA        | 3393 PUNCTURE OF LUNG               |
| 315 LOCAL DESTRUCT TRACH LES         | 3398 BRONCHIAL OPERATION NEC        |
| 3161 SUTURE OF LARYNGEAL LAC         | 3399 LUNG OPERATION NEC             |
| 3162 LARYNGEAL FISTULA CLOS          | 3402 EXPLORATORY THORACOTOMY        |
| 3163 LARYNGOSTOMY REVISION           | 3403 REOPEN THORACOTOMY SITE        |
| 3164 LARYNGEAL FX REPAIR             | 341 INCISION OF MEDIASTINUM         |
| 3169 OTHER LARYNGEAL REPAIR          | 3421 TRANSPLEURA THORACOSCOPY       |
| 3171 SUTURE OF TRACHEAL LACER        | 3422 MEDIASTINOSCOPY                |
| 3172 CLOSURE OF TRACHEOSTOMY         | 3426 OPEN MEDIASTINAL BIOPSY        |
| 3173 TRACHEA FISTULA CLOS NEC        | 3427 BIOPSY OF DIAPHRAGM            |
| 3174 REVISION OF TRACHEOSTOMY        | 3428 DX PROCEDURE THORAX NEC        |
| 3175 TRACHEAL RECONSTRUCTION         | 3429 DX PROC MEDIASTINUM NEC        |
| 3179 OTHER TRACHEAL REPAIR           | 343 DESTRUCT MEDIASTIN LES          |
| 3191 LARYNGEAL NERV DIVISION         | 344 DESTRUCT CHEST WALL LES         |
| 3192 LYSIS TRACH/LARYNX ADHES        | 3451 DECORTICATION OF LUNG          |
| 3198 OTH LARYNGEAL OPERATION         | 3459 OTHER PLEURAL EXCISION         |
| 3199 OTHER TRACHEAL OPERATION        | 346 SCARIFICATION OF PLEURA         |
| 320 OTHER TRACHEAL OPERATION         | 3473 CLOS THORACIC FISTUL NEC       |
| 3209 OTHER DESTRUCT BRONC LES        | 3474 PECTUS DEFORMITY REPAIR        |
| 321 OTHER BRONCHIAL EXCISION         | 3479 OTHER CHEST WALL REPAIR        |
| 3221 EMPHYSEMA BLEB PPLICATION       | 3481 EXCISE DIAPHRAGM LESION        |
| 3222 LUNG VOL REDUCTION SURG         | 3482 SUTURE DIAPHRAGM LACERAT       |
| 3223 OPEN ABLTN LUNG LES/TISS OCT06- | 3483 CLOSE DIAPHRAGM FISTULA        |

|                                      |                                     |
|--------------------------------------|-------------------------------------|
| 3224 PERC ABLTN LUNG LES/TISS OCT06- | 3484 OTHER DIAPHRAGM REPAIR         |
| 3485 IMPLANT DIAPHRA PACEMAKE        | 3594 CONDUIT ARTIUM-PULM ART        |
| 3489 DIAPHRAGM OPERATION NEC         | 3595 HEART REPAIR REVISION          |
| 3493 REPAIR OF PLEURA                | 3596 PERC HEART VALVULOPLASTY       |
| 3499 THORACIC OPERATION NEC          | 3598 OTHER HEART SEPTA OPS          |
| 3500 CLOSED VALVOTOMY NOS            | 3599 OTHER HEART VALVE OPS          |
| 3501 CLOSED AORTIC VALVOTOMY         | 3600 OTHER HEART VALVE OPS          |
| 3502 CLOSED MITRAL VALVOTOMY         | 3601 PTCA-1 VES/ATH W/O AGENT       |
| 3503 CLOSED PULMON VALVOTOMY         | 3602 PTCA-1 VES/ATH W AGENT         |
| 3504 CLOSED TRICUSP VALVOTOMY        | 3603 OPEN CORONRY ANGIOPLASTY       |
| 3510 OPEN VALVULOPLASTY NOS          | 3605 PTCA-MULTIPLE VESSEL/ATH       |
| 3511 OPN AORTIC VALVULOPLASTY        | 3609 REM OF COR ART OBSTR NEC       |
| 3512 OPN MITRAL VALVULOPLASTY        | 3610 AORTOCORONARY BYPASS NOS       |
| 3513 OPN PULMON VALVULOPLASTY        | 3611 AORTOCOR BYPAS-1 COR ART       |
| 3514 OPN TRICUS VALVULOPLASTY        | 3612 AORTOCOR BYPAS-2 COR ART       |
| 3520 REPLACE HEART VALVE NOS         | 3613 AORTOCOR BYPAS-3 COR ART       |
| 3521 REPLACE AORT VALV-TISSUE        | 3614 AORTCOR BYPAS-4+ COR ART       |
| 3522 REPLACE AORTIC VALVE NEC        | 3615 1 INT MAM-COR ART BYPASS       |
| 3523 REPLACE MITR VALV-TISSUE        | 3616 2 INT MAM-COR ART BYPASS       |
| 3524 REPLACE MITRAL VALVE NEC        | 3617 ABD-CORON ARTERY BYPASS        |
| 3525 REPLACE PULM VALV-TISSUE        | 3619 HRT REVAS BYPS ANAS NEC        |
| 3526 REPLACE PULMON VALVE NEC        | 362 ARTERIAL IMPLANT REVASC         |
| 3527 REPLACE TRIC VALV-TISSUE        | 363 ARTERIAL IMPLANT REVASC         |
| 3528 REPLACE TRICUSP VALV NEC        | 3631 OPEN CHEST TRANS REVASC        |
| 3531 PAPILLARY MUSCLE OPS            | 3632 OTH TRANSMYO REVASCULAR        |
| 3532 CHORDAE TENDINEAE OPS           | 3633 ENDO TRANSMYO REVASCULAR       |
| 3533 ANNULOPLASTY                    | OCT06-                              |
| 3534 INFUNDIBULECTOMY                | 3634 PERC TRANSMYO REVASCULAR       |
| 3535 TRABECUL CARNEAE CORD OP        | OCT06-                              |
| 3539 TISS ADJ TO VALV OPS NEC        | 3639 OTH HEART REVASCULAR           |
| 3542 CREATE SEPTAL DEFECT            | 3691 CORON VESS ANEURYSM REP        |
| 3550 PROSTH REP HRT SEPTA NOS        | 3699 HEART VESSEL OP NEC            |
| 3551 PROS REP ATRIAL DEF-OPN         | 3710 INCISION OF HEART NOS          |
| 3552 PROS REPAIR ATRIA DEF-CL        | 3711 CARDIOTOMY                     |
| 3553 PROS REPAIR VENTRIC DEF         | 3712 PERICARDIOTOMY                 |
| 3554 PROS REP ENDOCAR CUSHION        | 3724 PERICARDIAL BIOPSY             |
| 3555 PROS REP VENTRC DEF-CLOS OCT06- | 3731 PERICARDIECTOMY                |
| 3560 GRFT REPAIR HRT SEPT NOS        | 3732 HEART ANEURYSM EXCISION        |
| 3561 GRAFT REPAIR ATRIAL DEF         | 3733 EXC/DEST HRT LESION OPEN       |
| 3562 GRAFT REPAIR VENTRIC DEF        | 3734 EXC/DEST HRT LES OTHER         |
| 3563 GRFT REP ENDOCAR CUSHION        | 3735 PARTIAL VENTRICULECTOMY        |
| 3570 HEART SEPTA REPAIR NOS          | 374 HEART & PERICARD REPAIR         |
| 3571 ATRIA SEPTA DEF REP NEC         | 3741 IMPL CARDIAC SUPPORT DEV OCT   |
| 3572 VENTR SEPTA DEF REP NEC         | 3749 HEART/PERICARD REPR NEC OCT05- |
| 3573 ENDOCAR CUSHION REP NEC         | 375 HEART & PERICARD REPAIR         |
| 3581 TOT REPAIR TETRAL FALLOT        | 3751 HEART TRANSPLANTATION OCT03-   |
| 3582 TOTAL REPAIR OF TAPVC           | 3752 IMPLANT TOT REP HRT SYS        |
| 3583 TOT REP TRUNCUS ARTERIOS        | 3753 REPL/REP THORAC UNIT HRT       |
| 3584 TOT COR TRANSPOS GRT VES        | 3754 REPL/REP OTH TOT HRT SYS       |
| 3591 INTERAT VEN RETRN TRANSP        | 3761 PULSATION BALLOON IMPLAN       |
| 3592 CONDUIT RT VENT-PUL ART         | 3762 IMPLANT HRT ASST SYS NEC       |



|                                       |                               |
|---------------------------------------|-------------------------------|
| 3593 CONDUIT LEFT VENTR-AORTA         | 3763 REPLACE HRT ASSIST SYST  |
| 3764 REMOVE HEART ASSIST SYS          | 3839 LEG VEIN RESECT/ANASTOM  |
| 3765 IMP EXT PUL HRT ASST SYS         | 3840 VESSEL RESECT/REPLAC NOS |
| 3766 IMP IMP PUL HRT ASST SYS         | 3841 INTRACRAN VES RESEC-REPL |
| 3767 IMP CARDIOMYOSTIMUL SYS          | 3842 HEAD/NECK VES RESEC-REPL |
| 3774 INT OR REPL LEAD EPICAR          | 3843 ARM VES RESECT W REPLACE |
| 3775 REVISION OF LEAD                 | 3844 RESECT ABDM AORTA W REPL |
| 3776 REPL TV ATRI-VENT LEAD           | 3845 RESECT THORAC VES W REPL |
| 3777 REMOVAL OF LEAD W/O REPL         | 3846 ABD ARTERY RESEC W REPLA |
| 3779 REVIS OR RELOCATE POCKET         | 3847 ABD VEIN RESECT W REPLAC |
| 3780 INT OR REPL PERM PACEMKR         | 3848 LEG ARTERY RESEC W REPLA |
| 3785 REPL PACEM W 1-CHAM, NON         | 3849 LEG VEIN RESECT W REPLAC |
| 3786 REPL PACEM 1-CHAM, RATE          | 3850 VARICOSE V LIG-STRIP NOS |
| 3787 REPL PACEM W DUAL-CHAM           | 3851 INTCRAN VAR V LIG-STRIP  |
| 3789 REVISE OR REMOVE PACEMAK         | 3852 HEAD/NECK VAR V LIG-STR  |
| 3790 INS LEFT ATR APPEND DEV (OCT 04) | 3853 ARM VARICOSE V LIG-STRIP |
| 3791 OPN CHEST CARDIAC MASSAG         | 3855 THORAC VAR V LIG-STRIP   |
| 3794 IMPLT/REPL CARDDEFIB TOT         | 3857 ABD VARICOS V LIGA-STRIP |
| 3795 IMPLT CARDIODEFIB LEADS          | 3859 LEG VARICOS V LIGA-STRIP |
| 3796 IMPLT CARDIODEFIB GENATR         | 3860 EXCISION OF VESSEL NOS   |
| 3797 REPL CARDIODEFIB LEADS           | 3861 INTRACRAN VESSEL EXCIS   |
| 3798 REPL CARDIODEFIB GENRATR         | 3862 HEAD/NECK VESSEL EXCIS   |
| 3799 OTHER HEART/PERICARD OPS         | 3863 ARM VESSEL EXCISION      |
| 3800 INCISION OF VESSEL NOS           | 3864 EXCISION OF AORTA        |
| 3801 INTRACRAN VESSEL INCIS           | 3865 THORACIC VESSEL EXCISION |
| 3802 HEAD/NECK VES INCIS NEC          | 3866 ABDOMINAL ARTERY EXCIS   |
| 3803 UPPER LIMB VESSEL INCIS          | 3867 ABDOMINAL VEIN EXCISION  |
| 3804 INCISION OF AORTA                | 3868 LEG ARTERY EXCISION      |
| 3805 THORACIC VESSEL INC NEC          | 3869 LEG VEIN EXCISION        |
| 3806 ABDOMEN ARTERY INCISION          | 387 INTERRUPTION VENA CAVA    |
| 3807 ABDOMINAL VEIN INCISION          | 3880 SURG VESSEL OCCLUS NEC   |
| 3808 LOWER LIMB ARTERY INCIS          | 3881 OCCLUS INTRACRAN VES NEC |
| 3809 LOWER LIMB VEIN INCISION         | 3882 OCCLUS HEAD/NECK VES NEC |
| 3810 ENDARTERECTOMY NOS               | 3883 OCCLUDE ARM VESSEL NEC   |
| 3811 INTRACRAN ENDARTERECTOMY         | 3884 OCCLUDE AORTA NEC        |
| 3812 HEAD & NECK ENDARTER NEC         | 3885 OCCLUDE THORACIC VES NEC |
| 3813 UPPER LIMB ENDARTERECTOM         | 3886 OCCLUDE ABD ARTERY NEC   |
| 3814 ENDARTERECTOMY OF AORTA          | 3887 OCCLUDE ABD VEIN NEC     |
| 3815 THORACIC ENDARTERECTOMY          | 3888 OCCLUDE LEG ARTERY NEC   |
| 3816 ABDOMINAL ENDARTERECTOMY         | 3889 OCCLUDE LEG VEIN NEC     |
| 3818 LOWER LIMB ENDARTERECT           | 390 SYSTEMIC-PULM ART SHUNT   |
| 3821 BLOOD VESSEL BIOPSY              | 391 INTRA-ABD VENOUS SHUNT    |
| 3829 BLOOD VESSEL DX PROC NEC         | 3921 CAVAL-PULMON ART ANASTOM |
| 3830 VESSEL RESECT/ANAST NOS          | 3922 AORTA-SUBCLV-CAROT BYPAS |
| 3831 INTRACRAN VES RESEC-ANAS         | 3923 INTRATHORACIC SHUNT NEC  |
| 3832 HEAD/NECK VES RESEC-ANAS         | 3924 AORTA-RENAL BYPASS       |
| 3833 ARM VESSEL RESECT/ANAST          | 3925 AORTA-ILIAC-FEMOR BYPASS |
| 3834 AORTA RESECTION & ANAST          | 3926 INTRA-ABDOMIN SHUNT NEC  |
| 3835 THOR VESSEL RESECT/ANAST         | 3927 DIALYSIS ARTERIOVENOSTOM |
| 3836 ABD VESSEL RESECT/ANAST          | 3928 EXTRACRAN-INTRACR BYPASS |
| 3837 ABD VEIN RESECT & ANAST          | 3929 VASC SHUNT & BYPASS NEC  |

|                                      |                               |
|--------------------------------------|-------------------------------|
| 3838 LEG ARTERY RESECT/ANAST         | 3930 SUTURE OF VESSEL NOS     |
| 3931 SUTURE OF ARTERY                | 3839 LEG VEIN RESECT/ANASTOM  |
| 3932 SUTURE OF VEIN                  | 3840 VESSEL RESECT/REPLAC NOS |
| 3941 POSTOP VASC OP HEM CONTR        | 3841 INTRACRAN VES RESEC-REPL |
| 3942 REVIS REN DIALYSIS SHUNT        | 3842 HEAD/NECK VES RESEC-REPL |
| 3943 REMOV REN DIALYSIS SHUNT        | 3843 ARM VES RESECT W REPLACE |
| 3949 VASC PROC REVISION NEC          | 3844 RESECT ABDM AORTA W REPL |
| 3950 ANGIO/ATH NON-CORO VES          | 3845 RESECT THORAC VES W REPL |
| 3951 CLIPPING OF ANEURYSM            | 3846 ABD ARTERY RESEC W REPLA |
| 3952 ANEURYSM REPAIR NEC             | 3847 ABD VEIN RESECT W REPLAC |
| 3953 ARTERIOVEN FISTULA REP          | 3848 LEG ARTERY RESEC W REPLA |
| 3954 RE-ENTRY OPERATION              | 3849 LEG VEIN RESECT W REPLAC |
| 3955 REIMPLAN ABERR RENAL VES        | 3850 VARICOSE V LIG-STRIP NOS |
| 3956 REPAIR VESS W TIS PATCH         | 3851 INTCRAN VAR V LIG-STRIP  |
| 3957 REP VESS W SYNTH PATCH          | 3852 HEAD/NECK VAR V LIG-STR  |
| 3958 REPAIR VESS W PATCH NOS         | 3853 ARM VARICOSE V LIG-STRIP |
| 3959 REPAIR OF VESSEL NEC            | 3855 THORAC VAR V LIG-STRIP   |
| 397 PER CARDIOPULMON BYPASS          | 3857 ABD VARICOS V LIGA-STRIP |
| 3971 ENDO IMPL GRFT ABD AORTA        | 3859 LEG VARICOS V LIGA-STRIP |
| 3972 ENDOVASC REPAIR HEAD VES        | 3860 EXCISION OF VESSEL NOS   |
| 3973 ENDO IMP GRFT THOR AORTA OCT05- | 3861 INTRACRAN VESSEL EXCIS   |
| 3974 ENDO REM OBS HD/NECK VES OCT06- | 3862 HEAD/NECK VESSEL EXCIS   |
| 3979 ENDO REPAIR OTHER VESSEL        | 3863 ARM VESSEL EXCISION      |
| 398 VASCULAR BODY OPERATIONS         | 3864 EXCISION OF AORTA        |
| 3991 FREEING OF VESSEL               | 3865 THORACIC VESSEL EXCISION |
| 3992 VEIN INJECT-SCLEROS AGNT        | 3866 ABDOMINAL ARTERY EXCIS   |
| 3993 INSERT VES-TO-VES CANNUL        | 3867 ABDOMINAL VEIN EXCISION  |
| 3994 REPLAC VES-TO-VES CANNUL        | 3868 LEG ARTERY EXCISION      |
| 3998 HEMORRHAGE CONTROL NOS          | 3869 LEG VEIN EXCISION        |
| 3999 VESSEL OPERATION NEC            | 387 INTERRUPTION VENA CAVA    |
| 400 INCIS LYMPHATIC STRUCTUR         | 3880 SURG VESSEL OCCLUS NEC   |
| 4011 LYMPHATIC STRUCT BIOPSY         | 3881 OCCLUS INTRACRAN VES NEC |
| 4019 LYMPHATIC DIAG PROC NEC         | 3882 OCCLUS HEAD/NECK VES NEC |
| 4021 EXCIS DEEP CERVICAL NODE        | 3883 OCCLUDE ARM VESSEL NEC   |
| 4022 EXCISE INT MAMMARY NODE         | 3884 OCCLUDE AORTA NEC        |
| 4023 EXCISE AXILLARY NODE            | 3885 OCCLUDE THORACIC VES NEC |
| 4024 EXCISE INGUINAL NODE            | 3886 OCCLUDE ABD ARTERY NEC   |
| 4029 SIMP EXC LYMPH STRUC NEC        | 3887 OCCLUDE ABD VEIN NEC     |
| 403 REGIONAL LYMPH NODE EXC          | 3888 OCCLUDE LEG ARTERY NEC   |
| 4040 RAD NECK DISSECTION NOS         | 3889 OCCLUDE LEG VEIN NEC     |
| 4041 UNILAT RAD NECK DISSECT         | 390 SYSTEMIC-PULM ART SHUNT   |
| 4042 BILAT RAD NECK DISSECT          | 391 INTRA-ABD VENOUS SHUNT    |
| 4050 RAD NODE DISSECTION NOS         | 3921 CAVAL-PULMON ART ANASTOM |
| 4051 RAD DISSEC AXILLARY NODE        | 3922 AORTA-SUBCLV-CAROT BYPAS |
| 4052 RAD DISSEC PERIAORT NODE        | 3923 INTRATHORACIC SHUNT NEC  |
| 4053 RAD DISSECT ILIAC NODES         | 3924 AORTA-RENAL BYPASS       |
| 4054 RADICAL GROIN DISSECTION        | 3925 AORTA-ILIAC-FEMOR BYPASS |
| 4059 RAD NODE DISSECTION NEC         | 3926 INTRA-ABDOMIN SHUNT NEC  |
| 4061 THORAC DUCT CANNULATION         | 3927 DIALYSIS ARTERIOVENOSTOM |
| 4062 THORACIC DUCT FISTULIZAT        | 3928 EXTRACRAN-INTRACR BYPASS |
| 4063 CLOSE THORACIC DUCT FIST        | 3929 VASC SHUNT & BYPASS NEC  |

|                               |                                   |
|-------------------------------|-----------------------------------|
| 4064 LIGATE THORACIC DUCT     | 3930 SUTURE OF VESSEL NOS         |
| 4069 THORACIC DUCT OP NEC     | 4268 STERN INTERPOSITION NEC      |
| 409 LYMPH STRUCTURE OP NEC    | 4269 STERN ESOPHAG ANAST NEC      |
| 410 BONE MARROW TRNSPLNT      | 427 ESOPHAGOMYOTOMY               |
| 4100 BONE MARROW TRNSPLNT NOS | 4282 SUTURE ESOPHAGEAL LACER      |
| 4101 AUTO BONE MT W/O PURG    | 4283 ESOPHAGOSTOMY CLOSURE        |
| 4102 ALO BONE MARROW TRNSPLNT | 4284 ESOPH FISTULA REPAIR NEC     |
| 4103 ALLOGRFT BONE MARROW NOS | 4285 ESOPHAG STRICTURE REPAIR     |
| 4104 AUTO HEM STEM CT W/O PUR | 4286 PROD SUBQ TUNNEL NO ANAS     |
| 4105 ALLO HEM STEM CT W/O PUR | 4287 ESOPHAGEAL GRAFT NEC         |
| 4106 CORD BLD STEM CELL TRANS | 4289 ESOPHAGEAL REPAIR NEC        |
| 4107 AUTO HEM STEM CT W PURG  | 4291 LIGATION ESOPH VARIX         |
| 4108 ALLO HEM STEM CT W PURG  | 430 GASTROTOMY                    |
| 4109 AUTO BONE MT W PURGING   | 431 GASTROTOMY                    |
| 412 SPLENOTOMY                | 432 OTHER GASTROSTOMY             |
| 4133 OPEN SPLEEN BIOPSY       | 433 PYLOROMYOTOMY                 |
| 4141 SPLENIC CYST MARSUPIAL   | 4342 LOCAL GASTR EXCISION NEC     |
| 4142 EXC SPLENIC LESION/TISS  | 4349 LOCAL GASTR DESTRUCT NEC     |
| 4143 PARTIAL SPLENECTOMY      | 435 PROXIMAL GASTRECTOMY          |
| 415 TOTAL SPLENECTOMY         | 436 DISTAL GASTRECTOMY            |
| 4193 EXC OF ACCESSORY SPLEEN  | 437 PART GASTREC W JEJ ANAST      |
| 4194 SPLEEN TRANSPLANTATION   | 4381 PART GAST W JEJ TRANSPOS     |
| 4195 REPAIR OF SPLEEN         | 4389 PARTIAL GASTRECTOMY NEC      |
| 4199 SPLEEN OPERATION NEC     | 4391 TOT GAST W INTES INTERPO     |
| 4201 ESOPHAGEAL WEB INCISION  | 4399 TOTAL GASTRECTOMY NEC        |
| 4209 ESOPHAGEAL INCISION NEC  | 4400 VAGOTOMY NOS                 |
| 4210 ESOPHAGOSTOMY NOS        | 4401 TRUNCAL VAGOTOMY             |
| 4211 CERVICAL ESOPHAGOSTOMY   | 4402 HIGHLY SELECT VAGOTOMY       |
| 4212 ESOPH POUCH EXTERIORIZAT | 4403 SELECTIVE VAGOTOMY NEC       |
| 4219 EXT FISTULIZAT ESOPH NEC | 4411 TRANSABDOMIN GASTROSCOPY     |
| 4221 ESOPHAGOSCOPY BY INCIS   | 4415 OPEN GASTRIC BIOPSY          |
| 4225 OPEN BIOPSY OF ESOPHAGUS | 442 GASTRIC DIAGNOS PROC NEC      |
| 4231 LOC EXCIS ESOPH DIVERTIC | 4421 DILATE PYLORUS, INCISION     |
| 4232 LOCAL EXCIS ESOPHAG NEC  | 4429 OTHER PYLOROPLASTY           |
| 4239 DESTRUCT ESOPHAG LES NEC | 4431 HIGH GASTRIC BYPASS          |
| 4240 ESOPHAGECTOMY NOS        | 4432 PERCU GASTROJEJUNOSTOMY      |
| 4241 PARTIAL ESOPHAGECTOMY    | 4438 LAP GASTROENTEROSTOMY (OCT   |
| 4242 TOTAL ESOPHAGECTOMY      | 4439 GASTROENTEROSTOMY NEC        |
| 4251 THORAC ESOPHAGUESOPHAGOS | 4440 SUTURE PEPTIC ULCER NOS      |
| 4252 THORAC ESOPHAGOGASTROST  | 4441 SUT GASTRIC ULCER SITE       |
| 4253 THORAC SM BOWEL INTERPOS | 4442 SUTURE DUODEN ULCER SITE     |
| 4254 THORAC ESOPHAGOENTER NEC | 445 REVISION GASTRIC ANASTOM      |
| 4255 THORAC LG BOWEL INTERPOS | 4461 SUTURE GASTRIC LACERAT       |
| 4256 THORAC ESOPHAGOCOLOS NEC | 4463 CLOSE GASTRIC FISTUL NEC     |
| 4258 THORAC INTERPOSITION NEC | 4464 GASTROPEXY                   |
| 4259 THORAC ESOPHAG ANAST NEC | 4465 ESOPHAGOGASTROPLASTY         |
| 4261 STERN ESOPHAGUESOPHAGOST | 4466 CREAT ESOPHAGASTR SPHINC     |
| 4262 STERN ESOPHAGOGASTROSTOM | 4467 LAP CREAT ESOPH SPHINCT (OCT |
| 4263 STERN SM BOWEL INTERPOS  | 4468 LAPAROSCOP GASTROPLSTY (OCT  |
| 4264 STERN ESOPHAGOENTER NEC  | 4469 GASTRIC REPAIR NEC           |
| 4265 STERN LG BOWEL INTERPOS  | 4491 LIGATE GASTRIC VARICES       |

|                                        |                                |
|----------------------------------------|--------------------------------|
| 4266 STERN ESOPHAGOCOLOS NEC           | 4492 INTRAOP GASTRIC MANIPUL   |
| 4495 LAP GASTRIC RESTRIC PROC (OCT 04) | 4640 INTEST STOMA REVIS NOS    |
| 4496 LAP REV GAST RESTRI PROC (OCT 04) | 4641 SM BOWEL STOMA REVISION   |
| 4497 LAP REM GAST RESTRIC DEV (OCT 04) | 4642 PERICOLOST HERNIA REPAIR  |
| 4498 ADJUST GAST RESTRICT DEV (OCT 04) | 4643 LG BOWEL STOMA REVIS NEC  |
| 4499 GASTRIC OPERATION NEC             | 4650 INTEST STOMA CLOSURE NOS  |
| 4500 INTESTINAL INCISION NOS           | 4651 SM BOWEL STOMA CLOSURE    |
| 4501 DUODENAL INCISION                 | 4652 LG BOWEL STOMA CLOSURE    |
| 4502 SMALL BOWEL INCISION NEC          | 4660 INTESTINAL FIXATION NOS   |
| 4503 LARGE BOWEL INCISION              | 4661 SM BOWEL-ABD WALL FIXAT   |
| 4511 TRANSAB SM BOWEL ENDOSC           | 4662 SMALL BOWEL FIXATION NEC  |
| 4515 OPEN SMALL BOWEL BIOPSY           | 4663 LG BOWEL-ABD WALL FIXAT   |
| 4521 TRANSAB LG BOWEL ENDOSC           | 4664 LARGE BOWEL FIXATION NEC  |
| 4526 OPEN LARGE BOWEL BIOPSY           | 4671 DUODENAL LACERAT SUTURE   |
| 4531 OTH EXCISE DUODENUM LES           | 4672 DUODENAL FISTULA CLOSURE  |
| 4532 DESTRUCT DUODEN LES NEC           | 4673 SMALL BOWEL SUTURE NEC    |
| 4533 LOCAL EXCIS SM BOWEL NEC          | 4674 CLOSE SM BOWEL FIST NEC   |
| 4534 DESTR SM BOWEL LES NEC            | 4675 SUTURE LG BOWEL LACERAT   |
| 4541 EXCISE LG INTESTINE LES           | 4676 CLOSE LG BOWEL FISTULA    |
| 4549 DESTRUC LG BOWEL LES NEC          | 4679 REPAIR OF INTESTINE NEC   |
| 4550 INTEST SEG ISOLAT NOS             | 4680 INTRA-AB BOWEL MANIP NOS  |
| 4551 SM BOWEL SEGMENT ISOLAT           | 4681 INTRA-ABD SM BOWEL MANIP  |
| 4552 LG BOWEL SEGMENT ISOLAT           | 4682 INTRA-ABD LG BOWEL MANIP  |
| 4561 MULT SEG SM BOWEL EXCIS           | 4691 MYOTOMY OF SIGMOID COLON  |
| 4562 PART SM BOWEL RESECT NEC          | 4692 MYOTOMY OF COLON NEC      |
| 4563 TOTAL REMOVAL SM BOWEL            | 4693 REVISE SM BOWEL ANASTOM   |
| 4571 MULT SEG LG BOWEL EXCIS           | 4694 REVISE LG BOWEL ANASTOM   |
| 4572 CECECTOMY                         | 4697 TRANSPLANT OF INTESTINE   |
| 4573 RIGHT HEMICOLECTOMY               | 4699 INTESTINAL OP NEC         |
| 4574 TRANSVERSE COLON RESECT           | 470 INTESTINAL OP NEC          |
| 4575 LEFT HEMICOLECTOMY                | 4701 LAP APPENDECTOMY          |
| 4576 SIGMOIDECTOMY                     | 4709 OTHER APPENDECTOMY        |
| 4579 PART LG BOWEL EXCIS NEC           | 471 OTHER APPENDECTOMY         |
| 458 TOT INTRA-ABD COLECTOMY            | 4711 LAP INCID APPENDECTOMY    |
| 4590 INTESTINAL ANASTOM NOS            | 4719 OTHER INCID APPENDECTOMY  |
| 4591 SM-TO-SM BOWEL ANASTOM            | 472 DRAIN APPENDICEAL ABSC     |
| 4592 SM BOWEL-RECT STUMP ANAS          | 4791 APPENDICOSTOMY            |
| 4593 SMALL-TO-LARGE BOWEL NEC          | 4792 CLOSE APPENDICEAL FISTUL  |
| 4594 LG-TO-LG BOWEL ANASTOM            | 4799 APPENDICEAL OPS NEC       |
| 4595 ANAL ANASTOMOSIS                  | 480 PROCTOTOMY                 |
| 4601 SM BOWEL EXTERIORIZATION          | 481 PROCTOSTOMY                |
| 4602 RESECT EXT SEG SM BOWEL           | 4821 TRANSAB PROCTOSIGMOIDOSC  |
| 4603 LG BOWEL EXTERIORIZATION          | 4825 OPEN RECTAL BIOPSY        |
| 4604 RESECT EXT SEG LG BOWEL           | 4835 LOCAL EXCIS RECTAL LES    |
| 4610 COLOSTOMY NOS                     | 4841 SOAVE SUBMUC RECT RESECT  |
| 4611 TEMPORARY COLOSTOMY               | 4849 PULL-THRU RECT RESEC NEC  |
| 4612 TEMPORARY COLOSTOMY               | 485 ABD-PERINEAL RECT RESECT   |
| 4613 PERMANENT COLOSTOMY               | 4861 TRANS SAC RECTOSIGMOIDECT |
| 4620 ILEOSTOMY NOS                     | 4862 ANT RECT RESECT W COLOST  |
| 4621 TEMPORARY ILEOSTOMY               | 4863 ANTERIOR RECT RESECT NEC  |
| 4622 CONTINENT ILEOSTOMY               | 4864 POSTERIOR RECT RESECTION  |

|                                      |                                      |
|--------------------------------------|--------------------------------------|
| 4623 PERMANENT ILEOSTOMY NEC         | 4865 DUHAMEL RECTAL RESECTION        |
| 4866 DUHAMEL RECTAL RESECTION        | 5026 ABLTN LIVER LES/TISS NEC OCT06- |
| 4869 RECTAL RESECTION NEC            | 5029 DESTRUC HEPATIC LES NEC         |
| 4871 SUTURE OF RECTAL LACER          | 503 HEPATIC LOBECTOMY                |
| 4872 CLOSURE OF PROCTOSTOMY          | 504 TOTAL HEPATECTOMY                |
| 4873 CLOSE RECTAL FIST NEC           | 5051 AUXILIARY LIVER TRANSPL         |
| 4874 RECTORECTOSTOMY                 | 5059 LIVER TRANSPLANT NEC            |
| 4875 ABDOMINAL PROCTOPEXY            | 5061 CLOSURE LIVER LACERAT           |
| 4876 PROCTOPEXY NEC                  | 5069 LIVER REPAIR NEC                |
| 4879 REPAIR OF RECTUM NEC            | 5102 TROCAR CHOLECYSTOSTOMY          |
| 4881 PERIRECTAL INCISION             | 5103 CHOLECYSTOSTOMY NEC             |
| 4882 PERIRECTAL EXCISION             | 5104 CHOLECYSTOTOMY NEC              |
| 4891 INCIS RECTAL STRICTURE          | 5113 OPEN BILIARY TRACT BX           |
| 4892 ANORECTAL MYOMECTIONY           | 5119 BILIARY TR DX PROC NEC          |
| 4893 REPAIR PERIRECT FISTULA         | 5121 OTH PART CHOLECYSTECTOMY        |
| 4899 RECTAL PERIRECT OP NEC          | 5122 CHOLECYSTECTOMY                 |
| 4901 INCIS PERIANAL ABSCESS          | 5123 LAPAROSCOPIC CHOLECYSTEC        |
| 4902 PERIANAL INCISION NEC           | 5124 LAP PART CHOLECYSTECTOMY        |
| 4904 PERIANAL EXCISION NEC           | 5131 GB-TO-HEPAT DUCT ANAST          |
| 4911 ANAL FISTULOTOMY                | 5132 GB-TO-INTESTINE ANASTOM         |
| 4912 ANAL FISTULECTOMY               | 5133 GB-TO-PANCREAS ANASTOM          |
| 493 ANAL/PERIAN DX PROC NEC          | 5134 GB-TO-STOMACH ANASTOMOS         |
| 4939 OTHER DESTRUC ANUS LES          | 5135 GALLBLADDER ANASTOM NEC         |
| 4944 HEMORRHOID CRYOTHERAPY          | 5136 CHOLEDOCHOENTEROSTOMY           |
| 4945 HEMORRHOID LIGATION             | 5137 HEPATIC DUCT-GI ANASTOM         |
| 4946 HEMORRHOIDECTIONY               | 5139 BILE DUCT ANASTOMOS NEC         |
| 4949 HEMORRHOID PROCEDURE NEC        | 5141 CDE FOR CALCULUS REMOV          |
| 4951 LEFT LAT SPHINCTEROTOMY         | 5142 CDE FOR OBSTRUCTION NEC         |
| 4952 POST SPHINCTEROTOMY             | 5143 CHOLEDOCHOHEPAT INTUBAT         |
| 4959 ANAL SPHINCTEROTOMY NEC         | 5149 INCIS OBSTR BILE DUC NEC        |
| 496 EXCISION OF ANUS                 | 5151 COMMON DUCT EXPLORATION         |
| 4971 SUTURE ANAL LACERATION          | 5159 BILE DUCT INCISION NEC          |
| 4972 ANAL CERCLAGE                   | 5161 EXCIS CYST DUCT REMNANT         |
| 4973 CLOSURE OF ANAL FISTULA         | 5162 EXCIS AMPULLA OF VATER          |
| 4974 GRACILIS MUSC TRANSPLAN         | 5163 COMMON DUCT EXCIS NEC           |
| 4975 IMPL OR REV ART ANAL SPH        | 5169 BILE DUCT EXCISION NEC          |
| 4976 REMOV ART ANAL SPHINCTER        | 5171 SIMPLE SUT-COMMON DUCT          |
| 4979 ANAL SPHINCT REPAIR NEC         | 5172 CHOLEDOCHOPLASTY                |
| 4991 INCISION OF ANAL SEPTUM         | 5179 BILE DUCT REPAIR NEC            |
| 4992 INSERT SUBQ ANAL STIMUL         | 5181 SPHINCTER OF ODDI DILAT         |
| 4993 ANAL INCISION NEC               | 5182 PANCREAT SPHINCTEROTOM          |
| 4994 REDUCTION ANAL PROLAPSE         | 5183 PANCREAT SPHINCTEROPLAS         |
| 4995 CONTROL ANAL HEMORRHAGE         | 5189 SPHINCT OF ODDI OP NEC          |
| 4999 ANAL OPERATION NEC              | 5191 REPAIR GB LACERATION            |
| 500 HEPATOTOMY                       | 5192 CLOSURE CHOLECYSTOSTOMY         |
| 5012 OPEN LIVER BIOPSY               | 5193 CLOS BILIARY FISTUL NEC         |
| 5019 HEPATIC DX PROC NEC             | 5194 REVIS BILE TRACT ANASTOM        |
| 5021 MARSUPIALIZAT LIVER LES         | 5195 REMOVE BILE DUCT PROSTH         |
| 5022 PARTIAL HEPATECTOMY             | 5199 BILIARY TRACT OP NEC            |
| 5023 OPN ABLTN LIVER LES/TISS OCT06- | 5201 CATH DRAIN-PANCREAT CYST        |
| 5024 PERC ABLTN LIVER LES/TIS OCT06- | 5209 PANCREATOTOMY NEC               |

|                                      |                                      |
|--------------------------------------|--------------------------------------|
| 5025 LAP ABLTN LIVER LES/TISS OCT06- | 5212 OPEN PANCREATIC BIOPSY          |
| 5219 PANCREATIC DX PROC NEC          | 5412 REOPEN RECENT LAP SITE          |
| 522 PANCREATIC DX PROC NEC           | 5419 LAPAROTOMY NEC                  |
| 5222 OTHER DESTRU PANCREA LES        | 5421 LAPAROSCOPY                     |
| 523 PANCREAT CYST MARSUPIALI         | 5422 ABDOMINAL WALL BIOPSY           |
| 524 INT DRAIN PANCREAT CYST          | 5423 PERITONEAL BIOPSY               |
| 5251 PROXIMAL PANCREATECTOMY         | 5429 ABD REGION DX PROC NEC          |
| 5252 DISTAL PANCREATECTOMY           | 543 DESTRUCT ABD WALL LESION         |
| 5253 RAD SUBTOT PANCREATECTOM        | 544 DESTRUCT PERITONEAL TISS         |
| 5259 PARTIAL PANCREATECT NEC         | 545 DESTRUCT PERITONEAL TISS         |
| 526 TOTAL PANCREATECTOMY             | 5451 LAP PERITON ADHESIOLYSIS        |
| 527 RAD PANCREATICODUODENECT         | 5459 OTH PERITON ADHESIOLYSIS        |
| 5280 PANCREAT TRANSPLANT NOS         | 5461 RECLOSE POST OP DISRUPT         |
| 5281 REIMPLANT PANCREATIC TIS        | 5462 DELAYED CLOS ABD WOUND          |
| 5282 PANCREATIC HOMOTRANSPLAN        | 5463 ABD WALL SUTURE NEC             |
| 5283 PANCREATIC HETEROTRANSPL        | 5464 PERITONEAL SUTURE               |
| 5291 TRNSPLNT ISLETS LANG NOS        | 5471 REPAIR OF GASTROSCHISIS         |
| 5292 CANNULATION PANCREA DUC         | 5472 ABDOMEN WALL REPAIR NEC         |
| 5295 PANCREATIC REPAIR NEC           | 5473 PERITONEAL REPAIR NEC           |
| 5296 PANCREATIC ANASTOMOSIS          | 5474 OMENTAL REPAIR NEC              |
| 5299 PANCREATIC OPERATION NEC        | 5475 MESENTERIC REPAIR NEC           |
| 5300 UNILAT ING HERN REP NOS         | 5492 REMOVE FB FROM PERITON          |
| 5301 REPAIR DIRECT ING HERNIA        | 5493 CREATE CUTANPERITON FIST        |
| 5302 REPAIR INDIR ING HERNIA         | 5494 CREAT PERITONEOVAS SHUNT        |
| 5303 DIR ING HERNIA REP-GRAFT        | 5495 PERITONEAL INCISION             |
| 5304 IND ING HERNIA REP-GRAFT        | 5501 NEPHROTOMY                      |
| 5305 ING HERNIA REP-GRAFT NOS        | 5502 NEPHROSTOMY                     |
| 5310 BILAT ING HERNIA REP NOS        | 5503 PERCU NEPHROSTM W/O FRAG        |
| 5311 BILAT DIR ING HERN REP          | 5504 PERCU NEPHROSTMY W FRAG         |
| 5312 BILAT IND ING HERN REP          | 5511 PYELOTOMY                       |
| 5313 BIL DIR/IND ING HRN REP         | 5512 PYELOSTOMY                      |
| 5314 BIL DIR ING HRN REP-GRFT        | 5524 OPEN RENAL BIOPSY               |
| 5315 BIL IND ING HRN REP-GRFT        | 5529 RENAL DIAGNOST PROC NEC         |
| 5316 BIL DIR/IND ING HERN-PRO        | 5531 RENAL LES MARSUPIALIZAT         |
| 5317 BIL ING HRN REP-GRFT NOS        | 5532 OPN ABLTN RENAL LES/TISS OCT06- |
| 5321 UNIL FEMOR HRN REP-GRFT         | 5533 PERC ABLTN RENL LES/TISS OCT06- |
| 5329 UNIL FEMOR HERN REP NEC         | 5534 LAP ABLTN RENAL LES/TISS OCT06- |
| 5331 BIL FEM HERN REPAIR-GRFT        | 5535 ABLTN RENAL LES/TISS NEC OCT06- |
| 5339 BIL FEM HERN REPAIR NEC         | 5539 LOC DESTR RENAL LES NEC         |
| 5341 UMBIL HERNIA REPAIR-GRFT        | 554 PARTIAL NEPHRECTOMY              |
| 5349 UMBIL HERNIA REPAIR NEC         | 5551 NEPHROURETERECTOMY              |
| 5351 INCISIONAL HERNIA REPAIR        | 5552 SOLITARY KIDNEY NEPHRECT        |
| 5359 ABD WALL HERN REPAIR NEC        | 5553 REJECTED KIDNEY NEPHRECT        |
| 5361 INCIS HERNIA REPAIR-GRFT        | 5554 BILATERAL NEPHRECTOMY           |
| 5369 ABD HERN REPAIR-GRFT NEC        | 5561 RENAL AUTOTRANSPLANT            |
| 537 ABD REPAIR-DIAPHR HERNIA         | 5569 KIDNEY TRANSPLANT NEC           |
| 5380 THOR REP-DIAPH HERN NOS         | 557 NEPHROPEXY                       |
| 5381 DIAPHRAGMATIC PPLICATION        | 5581 SUTURE KIDNEY LACERATION        |
| 5382 PARASTERN HERNIA REPAIR         | 5582 CLOSE NEPHROST & PYELOST        |
| 539 OTHER HERNIA REPAIR              | 5583 CLOSE RENAL FISTULA NEC         |
| 540 ABDOMINAL WALL INCISION          | 5584 REDUCE RENAL PEDICL TORS        |

|                               |                               |
|-------------------------------|-------------------------------|
| 5411 EXPLORATORY LAPAROTOMY   | 5585 SYMPHYSIOTOMY            |
| 5586 RENAL ANASTOMOSIS        | 5779 TOTAL CYSTECTOMY NEC     |
| 5587 CORRECT URETEROPELV JUNC | 5781 SUTURE BLADDER LACERAT   |
| 5589 RENAL REPAIR NEC         | 5782 CYSTOSTOMY CLOSURE       |
| 5591 RENAL DECAPSULATION      | 5783 ENTEROVESICO FIST REPAIR |
| 5597 IMPLANT MECHANIC KIDNEY  | 5784 VESIC FISTULA REPAIR NEC |
| 5598 REMOV MECHANICAL KIDNEY  | 5785 CYSTOURETHROPLASTY       |
| 5599 RENAL OPERATION NEC      | 5786 BLADDER EXSTROPHY REPAIR |
| 560 TU REMOV URETER OBSTRUCT  | 5787 BLADDER RECONSTRUCTION   |
| 561 URETERAL MEATOTOMY        | 5788 BLADDER ANASTOMOSIS NEC  |
| 562 URETEROTOMY               | 5789 BLADDER REPAIR NEC       |
| 5634 OPEN URETERAL BIOPSY     | 5791 BLADDER SPHINCTEROTOMY   |
| 5639 URETERAL DX PROCEDUR NEC | 5793 CONTROL BLADD HEMORRHAGE |
| 5640 URETERECTOMY NOS         | 5796 IMPLANT BLADDER STIMULAT |
| 5641 PARTIAL URETERECTOMY     | 5797 REPLACE BLADDER STIMULAT |
| 5642 TOTAL URETERECTOMY       | 5798 REMOVE BLADDER STIMULAT  |
| 5651 FORM CUTAN ILEOURETEROST | 5799 BLADDER OPERATION NEC    |
| 5652 REVIS CUTAN ILEOURETEROS | 580 URETHROTOMY               |
| 5661 FORM CUTAN URETEROSTOMY  | 581 URETHRAL MEATOTOMY        |
| 5662 REVIS CUTAN URETEROS NEC | 5841 SUTURE URETHRAL LACERAT  |
| 5671 URIN DIVERSION TO BOWEL  | 5842 URETHROSTOMY CLOSURE     |
| 5672 REVIS URETEROENTEROSTOMY | 5843 CLOSE URETH FISTULA NEC  |
| 5673 NEPHROCYSTANASTOMOSI NOS | 5844 URETHRAL REANASTOMOSIS   |
| 5674 URETERONEOCYSTOSTOMY     | 5845 HYPO-EPISPADIUS REPAIR   |
| 5675 TRANSURETEROURETEROSTOMY | 5846 URETH RECONSTRUCTION NEC |
| 5679 URETERAL ANASTOMOSIS NEC | 5847 URETHRAL MEATOPLASTY     |
| 5681 INTRALUM URETE ADHESIOLY | 5849 URETHRAL REPAIR NEC      |
| 5682 SUTURE URETERAL LACERAT  | 585 URETH STRICTURE RELEASE   |
| 5683 URETEROSTOMY CLOSURE     | 5891 PERIURETHRAL INCISION    |
| 5684 CLOSE URETER FISTULA NEC | 5892 PERIURETHRAL EXCISION    |
| 5685 URETEROPEXY              | 5893 IMPLT ARTF URIN SPHINCT  |
| 5686 REMOVE URETERAL LIGATURE | 5899 URETH/PERIURETH OP NEC   |
| 5689 REPAIR OF URETER NEC     | 5900 RETROPERIT DISSECT NOS   |
| 5692 IMPLANT URETERAL STIMUL  | 5901 RETROPERIT DISSECT NOS   |
| 5693 REPLACE URETERAL STIMUL  | 5902 PERIREN ADHESIOLYS NEC   |
| 5694 REMOVE URETERAL STIMULAT | 5903 LAP LYS PERIREN/URET ADH |
| 5695 LIGATION OF URETER       | 5909 PERIREN/URETER INCIS NEC |
| 5699 URETERAL OPERATION NEC   | 5911 OTH LYS PERIVES ADHESIO  |
| 5712 CYSTOTOMY & ADHESIOLYSIS | 5912 LAP LYS PERIVESURETH ADH |
| 5718 OTHER SUPRAPU CYSTOSTOMY | 5919 PERIVESICAL INCISION NEC |
| 5719 CYSTOTOMY NEC            | 5921 PERIREN/URETERAL BIOPSY  |
| 5721 VESICOSTOMY              | 5929 PERIREN/URET DX PROC NEC |
| 5722 REVISE CLO VESICOSTOMY   | 593 URETHROVES JUNCT PPLICAT  |
| 5733 CLOS TRANSURETH BLADD BX | 594 SUPRAPUBIC SLING OP       |
| 5734 OPEN BLADDER BIOPSY      | 595 RETROPUBIC URETH SUSPENS  |
| 5739 BLADDER DIAGNOS PROC NEC | 596 PARAURETHRAL SUSPENSION   |
| 5741 TU ADHESIOLYSIS BLADDER  | 5971 LEVATOR MUSC SUSPENSION  |
| 5749 TU DESTRUC BLADD LES NEC | 5979 URIN INCONTIN REPAIR NEC |
| 5751 EXCISION OF URACHUS      | 5991 PERIREN/VESICLE EXCISION |
| 5759 BLADDER LES DESTRUCT NEC | 5992 PERIREN/VESICLE OP NEC   |
| 576 PARTIAL CYSTECTOMY        | 600 INCISION OF PROSTATE      |

|                               |                               |
|-------------------------------|-------------------------------|
| 5771 RADICAL CYSTECTOMY       | 6012 OPEN PROSTATIC BIOPSY    |
| 6014 OPEN SEMINAL VESICLES BX | 6383 EPIDIDYMOVASOSTOMY       |
| 6015 PERIPROSTATIC BIOPSY     | 6385 REMOV VAS DEFERENS VALVE |
| 6018 PROSTATIC DX PROCED NEC  | 6389 VAS & EPIDIDY REPAIR NEC |
| 6019 SEMIN VES DX PROCED NEC  | 6392 EPIDIDYNOTOMY            |
| 602 SEMIN VES DX PROCED NEC   | 6393 SPERMATIC CORD INCISION  |
| 6021 TRANSURETH PROSTATECTOMY | 6394 SPERM CORD ADHESIOLYSIS  |
| 6029 OTH TRANSURETH PROSTATEC | 6395 INSERT VALVE IN VAS DEF  |
| 603 SUPRAPUBIC PROSTATECTOMY  | 6399 CORD/EPID/VAS OPS NEC    |
| 604 RETROPUBIC PROSTATECTOMY  | 640 CIRCUMCISION              |
| 605 RADICAL PROSTATECTOMY     | 6411 PENILE BIOPSY            |
| 6061 LOS EXCIS PROSTATIC LES  | 642 LOCAL EXCIS PENILE LES    |
| 6062 PERINEAL PROSTATECTOMY   | 643 AMPUTATION OF PENIS       |
| 6069 PROSTATECTOMY NEC        | 6441 SUTURE PENILE LACERATION |
| 6072 SEMINAL VESICLE INCISION | 6442 RELEASE OF CHORDEE       |
| 6073 SEMINAL VESICLE EXCISION | 6443 CONSTRUCTION OF PENIS    |
| 6079 SEMINAL VESICLE OP NEC   | 6444 RECONSTRUCTION OF PENIS  |
| 6081 PERIPROSTATIC INCISION   | 6445 REPLANTATION OF PENIS    |
| 6082 PERIPROSTATIC EXCISION   | 6449 PENILE REPAIR NEC        |
| 6093 REPAIR OF PROSTATE       | 645 SEX TRANSFORMAT OP NEC    |
| 6094 CONTROL PROSTATE HEMORR  | 6492 INCISION OF PENIS        |
| 6095 TRANS BAL DIL PROS URETH | 6493 DIVISION OF PENILE ADHES |
| 6096 TU DESTR PROSTATE BY MT  | 6495 INS NONINFL PENIS PROSTH |
| 6097 OTH TU DESTR PROS - RT   | 6496 REMOVE INT PENILE PROSTH |
| 6099 PROSTATIC OPERATION NEC  | 6497 INS INFLATE PENIS PROSTH |
| 612 EXCISION OF HYDROCELE     | 6498 PENILE OPERATION NEC     |
| 6142 SCROTAL FISTULA REPAIR   | 6499 MALE GENITAL OP NEC      |
| 6149 SCROTUM/TUNIC REPAIR NEC | 650 MALE GENITAL OP NEC       |
| 6192 EXCISION TUNICA LES NEC  | 6501 LAPAROSCOPIC OOPHOROTOMY |
| 6199 SCROTUM & TUNICA OP NEC  | 6509 OTHER OOPHOROTOMY        |
| 620 INCISION OF TESTES        | 6511 OVARIAN ASPIRAT BIOPSY   |
| 6212 OPEN TESTICULAR BIOPSY   | 6512 OVARIAN BIOPSY NEC       |
| 6219 TESTES DX PROCEDURE NEC  | 6513 LAP BIOPSY OF OVARY      |
| 622 TESTICULAR LES DESTRUCT   | 6514 OTH LAP DX PROC OVARIES  |
| 623 UNILATERAL ORCHIECTOMY    | 6519 OVARIAN DX PROCEDURE NEC |
| 6241 REMOVE BOTH TESTES       | 6521 OVARIAN CYST MARSUPIALIZ |
| 6242 REMOVE SOLITARY TESTIS   | 6522 OVARIAN WEDGE RESECTION  |
| 625 ORCHIOPEXY                | 6523 LAP MARSUP OVARIAN CYST  |
| 6261 SUTURE TESTICULAR LACER  | 6524 LAP WEDGE RESECT OVARY   |
| 6269 TESTICULAR REPAIR NEC    | 6525 OTH LAP LOC EXC DEST OVA |
| 627 INSERT TESTICULAR PROSTH  | 6529 LOCAL DESTR OVA LES NEC  |
| 6299 TESTICULAR OPERATION NEC | 653 LOCAL DESTR OVA LES NEC   |
| 6309 SPERMAT CORD/VAS DX NEC  | 6531 LAP UNILAT OOPHORECTOMY  |
| 631 EXC SPERMATIC VARICOCELE  | 6539 OTH UNILAT OOPHORECTOMY  |
| 632 EXCISE EPIDIDYMIS CYST    | 654 OTH UNILAT OOPHORECTOMY   |
| 633 EXCISE CORD/EPID LES NEC  | 6541 LAP UNI SALPINGO-OOPHOR  |
| 634 EPIDIDYMECTOMY            | 6549 OTH UNI SALPINGO-OOPHOR  |
| 6351 SUTURE CORD & EPID LACER | 6551 OTH REMOVE BOTH OVARIES  |
| 6353 TRANSPLANT SPERMAT CORD  | 6552 OTH REMOVE REMAIN OVARY  |
| 6359 CORD & EPIDID REPAIR NEC | 6553 LAP REMOVE BOTH OVARIES  |
| 6381 SUTURE VAS & EPIDID LAC  | 6554 LAP REMOVE REMAIN OVARY  |



|                                |                                     |
|--------------------------------|-------------------------------------|
| 6382 POSTOP VAS RECONSTRUCT    | 6561 OTH REMOVE OVARIES/TUBES       |
| 6562 OTH REMOVE REM OVA/TUBE   | 6719 CERVICAL DX PROCEDUR NEC       |
| 6563 LAP REMOVE OVARIES/TUBES  | 672 CONIZATION OF CERVIX            |
| 6564 LAP REMOVE REM OVA/TUBE   | 6731 CERVICAL CYST MARSUPIAL        |
| 6571 OTH SIMPLE SUTURE OVARY   | 6732 CERVICAL LES CAUTERIZAT        |
| 6572 OTH REIMPLANT OF OVARY    | 6733 CERVICAL LES CRYOTHERAPY       |
| 6573 OTH SALPINGO-OOPHOROPLAS  | 6739 CERVICAL LES DESTRUC NEC       |
| 6574 LAP SIMPLE SUTURE OVARY   | 674 AMPUTATION OF CERVIX            |
| 6575 LAP REIMPLANT OF OVARY    | 675 AMPUTATION OF CERVIX            |
| 6576 LAP SALPINGO-OOPHOROPLAS  | 6751 TRANSAB CERCLAGE CERVIX        |
| 6579 REPAIR OF OVARY NEC       | 6759 OTH REP INT CERVICAL OS        |
| 658 REPAIR OF OVARY NEC        | 6761 SUTURE CERVICAL LACERAT        |
| 6581 LAP ADHESIOLYS OVA/TUBE   | 6762 CERVICAL FISTULA REPAIR        |
| 6589 ADHESIOLYSIS OVARY/TUBE   | 6769 CERVICAL REPAIR NEC            |
| 6591 ASPIRATION OF OVARY       | 680 HYSTEROTOMY                     |
| 6592 TRANSPLANTATION OF OVARY  | 6813 OPEN UTERINE BIOPSY            |
| 6593 MANUAL RUPT OVARIAN CYST  | 6814 OPEN UTERINE LIGAMENT BX       |
| 6594 OVARIAN DENERVATION       | 6815 CLOS UTERINE LIGAMENT BX       |
| 6595 OVARIAN TORSION RELEASE   | 6816 CLOSED UTERINE BIOPSY          |
| 6599 OVARIAN OPERATION NEC     | 6819 UTERUS/ADNEX DX PROC NEC       |
| 660 OVARIAN OPERATION NEC      | 6821 ENDOMET SYNECHIAE DIVIS        |
| 6601 SALPINGOTOMY              | 6822 INCISION UTERINE SEPTUM        |
| 6602 SALPINGOSTOMY             | 6823 ENDOMETRIAL ABLATION           |
| 6611 FALLOPIAN TUBE BIOPSY     | 6829 UTERINE LES DESTRUCT NEC       |
| 6619 FALLOP TUBE DX PROC NEC   | 683 UTERINE LES DESTRUCT NEC        |
| 6621 BILAT ENDOSC CRUSH TUBE   | 6831 LAP SCERVIC HYSTERECTOMY       |
| 6622 BILAT ENDOSC DIVIS TUBE   | 6839 OTH SUBTOT ABD HYSTERECT10/03  |
| 6629 BILAT ENDOSC OCC TUBE NEC | 684 TOTAL ABD HYSTERECTOMY          |
| 6631 BILAT TUBAL CRUSHING NEC  | 6841 LAP TOTAL ABDOMINAL HYST 10/06 |
| 6632 BILAT TUBAL DIVISION NEC  | 6849 TOTAL ABD HYST NEC/NOS OCT06-  |
| 6639 BILAT TUBAL DESTRUCT NEC  | 685 VAGINAL HYSTERECTOMY            |
| 664 TOTAL UNILAT SALPINGECT    | 6851 LAP AST VAG HYSTERECTOMY       |
| 6651 REMOVE BOTH FALLOP TUBES  | 6859 VAG HYSTERECTOMY NEC/NOS       |
| 6652 REMOVE SOLITARY FAL TUBE  | 686 RADICAL ABD HYSTERECTOMY        |
| 6661 DESTROY FALLOP TUBE LES   | 6861 LAP RADICAL ABD HYST 10/06     |
| 6662 REMOV TUBE & ECTOP PREG   | 6869 RADICAL ABD HYST NEC/NOS 10/06 |
| 6663 BILAT PART SALPINGEC NOS  | 687 RADICAL VAG HYSTERECTOMY        |
| 6669 PARTIAL SALPINGECTOM NEC  | 6871 LAP RADICAL VAGINAL HYST 10/06 |
| 6671 SIMPL SUTURE FALLOP TUBE  | 6879 RADICAL VAG HYST NEC/NOS 10/06 |
| 6672 SALPINGO-OOPHOROSTOMY     | 688 PELVIC EVISCERATION             |
| 6673 SALPINGO-SALPINGOSTOMY    | 689 HYSTERECTOMY NEC/NOS            |
| 6674 SALPINGO-UTEROSTOMY       | 6901 D & C FOR PREG TERMINAT        |
| 6679 FALLOP TUBE REPAIR NEC    | 6902 D & C POST DELIVERY            |
| 6692 UNILAT FALLOP TUBE DESTR  | 6909 D & C NEC                      |
| 6693 IMPL FALLOP TUBE PROSTH   | 6911 D & C NEC                      |
| 6694 REMOV FALLOP TUBE PROSTH  | 6919 DESTRUC UTER SUPPORT NEC       |
| 6695 BLOW THERAPEUT INTO TUBE  | 6921 INTERPOSIT OP UTERIN LIG       |
| 6696 FALLOPIAN TUBE DILATION   | 6922 UTERINE SUSPENSION NEC         |
| 6697 BURY FIMBRIAE IN UTERUS   | 6923 VAG REPAIR INVERS UTERUS       |
| 6699 FALLOPIAN TUBE OP NEC     | 6929 UTERUS/ADNEXA REPAIR NEC       |
| 6711 ENDOCERVICAL BIOPSY       | 693 PARACERV UTERINE DENERV         |

|                               |                               |
|-------------------------------|-------------------------------|
| 6712 CERVICAL BIOPSY NEC      | 6941 SUTURE UTERINE LACERAT   |
| 6942 CLOSURE UTERINE FISTULA  | 719 OTHER FEMALE GENITAL OPS  |
| 6949 UTERINE REPAIR NEC       | 7394 PUBIOTOMY TO ASSIST DEL  |
| 6951 ASPIRAT CURET-PREG TERMI | 7399 OPS ASSISTING DELIV NEC  |
| 6952 ASPIRAT CURET-POST DELIV | 740 CLASSICAL C-SECTION       |
| 6995 INCISION OF CERVIX       | 741 LOW CERVICAL C-SECTION    |
| 6997 REMOVE PENETRAT CERV FB  | 742 EXTRAPERITONEAL C-SECT    |
| 6998 UTERINE SUPPORT OP NEC   | 743 REM EXTRATUB ECTOP PREG   |
| 6999 UTERINE OPERATION NEC    | 744 CESAREAN SECTION NEC      |
| 7012 CULDOTOMY                | 7491 HYSTEROTOMY TO TERMIN PG |
| 7013 INTRALUM VAG ADHESIO LYS | 7499 CESAREAN SECTION NOS     |
| 7014 VAGINOTOMY NEC           | 7536 CORRECTION FETAL DEFECT  |
| 7023 CUL-DE-SAC BIOPSY        | 7550 REPAIR OB LAC UTERUS NOS |
| 7024 VAGINAL BIOPSY           | 7551 REPAIR OB LACERAT CERVIX |
| 7029 VAGIN/CUL-DE-SAC DX NEC  | 7552 REPAIR OB LAC CORP UTERI |
| 7031 HYMENECTOMY              | 7561 REPAIR OB LAC BLAD/URETH |
| 7032 EXCIS CUL-DE-SAC LESION  | 7593 SURG CORR INVERT UTERUS  |
| 7033 EXCISION VAGINAL LESION  | 7599 OBSTETRIC OPERATION NEC  |
| 704 VAGINAL OBLITERATION      | 7601 FACIAL BONE SEQUESTRECT  |
| 7050 CYSTOCEL/RECTOCEL REPAIR | 7609 FACIAL BONE INCISION NEC |
| 7051 CYSTOCELE REPAIR         | 7611 FACIAL BONE BIOPSY       |
| 7052 RECTOCELE REPAIR         | 7619 FACIAL BONE DX PROC NEC  |
| 7061 VAGINAL CONSTRUCTION     | 762 DESTRUCT FACIAL BONE LES  |
| 7062 VAGINAL RECONSTRUCTION   | 7631 PARTIAL MANDIBULECTOMY   |
| 7071 SUTURE VAGINA LACERATION | 7639 PART FACIAL OSTECTOM NEC |
| 7072 REPAIR COLOVAGIN FISTULA | 7641 TOT MANDIBULEC W RECONST |
| 7073 REPAIR RECTOVAG FISTULA  | 7642 TOTAL MANDIBULECTOMY NEC |
| 7074 REP VAGINOENT FISTUL NEC | 7643 MANDIBULAR RECONST NEC   |
| 7075 REPAIR VAG FISTULA NEC   | 7644 TOT FACE OSTECT W RECONS |
| 7076 HYMENORRHAPHY            | 7645 TOT FACE BONE OSTECT NEC |
| 7077 VAGINAL SUSPENS & FIXAT  | 7646 FACIAL BONE RECONSTR NEC |
| 7079 VAGINAL REPAIR NEC       | 765 TEMPOROMAND ARTHROPLASTY  |
| 708 VAGINAL VAULT OBLITERAT   | 7661 CL OSTEOPLASTY MAND RAMI |
| 7091 VAGINAL OPERATION NEC    | 7662 OPEN OSTEOPLAS MAND RAMI |
| 7092 CUL-DE-SAC OPERATION NEC | 7663 OSTEOPLASTY MANDIBLE BDY |
| 7101 VULVAR ADHESIO LYSIS     | 7664 MAND ORTHOGNATHIC OP NEC |
| 7109 INCIS VULVA/PERINEUM NEC | 7665 SEG OSTEOPLASTY MAXILLA  |
| 7111 VULVAR BIOPSY            | 7666 TOT OSTEOPLASTY MAXILLA  |
| 7119 VULVAR DIAGNOS PROC NEC  | 7667 REDUCTION GENIOPLASTY    |
| 7122 INCISE BARTHOLIN'S GLAND | 7668 AUGMENTATION GENIOPLASTY |
| 7123 BARTHOLIN GLAND MARSUP   | 7669 FACIAL BONE REPAIR NEC   |
| 7124 DESTRUC BARTHOLIN GLAND  | 7670 REDUCTION FACIAL FX NOS  |
| 7129 BARTHOLIN'S GLAND OP NEC | 7672 OPN REDUCT MALAR/ZYGO FX |
| 713 LOCAL VULVAR EXCIS NEC    | 7674 OPEN REDUCT MAXILLARY FX |
| 714 OPERATIONS ON CLITORIS    | 7676 OPEN REDUCT MANDIBLE FX  |
| 715 RADICAL VULVECTOMY        | 7677 OPEN REDUCT ALVEOLAR FX  |
| 7161 UNILATERAL VULVECTOMY    | 7679 OPEN REDUCT FACE FX NEC  |
| 7162 BILATERAL VULVECTOMY     | 7691 BONE GRAFT TO FACE BONE  |
| 7171 SUTURE VULVAR LACERATION | 7692 SYN IMPLANT TO FACE BONE |
| 7172 REPAIR VULVAR FISTULA    | 7694 OPEN REDUCT TM DISLOCAT  |
| 7179 VULVAR/PERIN REPAIR NEC  | 7697 REMOVE INT FIX FACE BONE |

|                               |                                |
|-------------------------------|--------------------------------|
| 718 OTHER VULVAR OPERATIONS   | 7699 FACIAL BONE/JNT OP NEC    |
| 7700 SEQUESTRECTOMY NOS       | 7752 BUNIONECT/SFT/ARTHRODES   |
| 7701 CHEST CAGE SEQUESTREC    | 7753 OTH BUNIONECT W SFT CORR  |
| 7702 HUMERUS SEQUESTRECTOMY   | 7754 EXC CORRECT BUNIONETTE    |
| 7703 RADIUS & ULNA SEQUESTREC | 7756 REPAIR OF HAMMER TOE      |
| 7704 METACARP/CARP SEQUESTREC | 7757 REPAIR OF CLAW TOE        |
| 7705 FEMORAL SEQUESTRECTOMY   | 7758 OTH EXC, FUS, REPAIR TOE  |
| 7706 PATELLAR SEQUESTRECTOMY  | 7759 BUNIONECTOMY NEC          |
| 7707 TIBIA/FIBULA SEQUESTREC  | 7760 LOC EXC BONE LESION NOS   |
| 7708 METATAR/TAR SEQUESTREC   | 7761 EXC CHEST CAGE BONE LES   |
| 7709 SEQUESTRECTOMY NEC       | 7762 LOC EXC BONE LES HUMERUS  |
| 7710 OTHER BONE INCISION NOS  | 7763 LOC EXC LES RADIUS/ULNA   |
| 7711 OTHER CHEST CAGE INCIS   | 7764 LOC EXC LES METACAR/CAR   |
| 7712 OTHER HUMERUS INCISION   | 7765 LOC EXC BONE LES FEMUR    |
| 7713 OTHER RADIUS/ULNA INCIS  | 7766 LOC EXC BONE LES PATELLA  |
| 7714 OTH METACARP/CARP INCIS  | 7767 LOC EXC LES TIBIA/FIBULA  |
| 7715 OTHER FEMORAL INCISION   | 7768 LOC EXC LES METATAR/TAR   |
| 7716 OTHER PATELLAR INCISION  | 7769 LOC EXC BONE LESION NEC   |
| 7717 OTHER TIBIA/FIBULA INCIS | 7770 EXCISE BONE FOR GRFT NOS  |
| 7718 OTH METATARS/TARS INCIS  | 7771 EX CHEST CAGE BONE-GFT    |
| 7719 BONE INCIS W/O DIV NEC   | 7772 EXCISE HUMERUS FOR GRAFT  |
| 7720 WEDGE OSTEOTOMY NOS      | 7773 EXCIS RADIUS/ULNA-GRAFT   |
| 7721 CHEST CAGE WEDG OSTEOTOM | 7774 EXCIS METACAR/CAR-GRAFT   |
| 7722 HUMERUS WEDGE OSTEOTOMY  | 7775 EXCISE FEMUR FOR GRAFT    |
| 7723 RADIUS/ULNA WEDG OSTEOTO | 7776 EXCISE PATELLA FOR GRAFT  |
| 7724 METACAR/CAR WEDG OSTEOTO | 7777 EXCISE TIB/FIB FOR GRAFT  |
| 7725 FEMORAL WEDGE OSTEOTOMY  | 7778 EXCIS METATAR/TAR-GRAFT   |
| 7726 PATELLAR WEDGE OSTEOTOMY | 7779 EXCISE BONE FOR GFT NEC   |
| 7727 TIBIA/FIBUL WEDG OSTEOT  | 7780 OTH PART OSTEECTOMY NOS   |
| 7728 METATAR/TAR WEDG OSTEOT  | 7781 OTH CHEST CAGE OSTEECTOMY |
| 7729 WEDGE OSTEOTOMY NEC      | 7782 PARTIAL HUMERECTOMY NEC   |
| 7730 OTHER BONE DIVISION NOS  | 7783 PART OSTEECT-RADIUS/ULNA  |
| 7731 CHEST CAGE BONE DIV NEC  | 7784 PART OSTEECT-METACAR/CAR  |
| 7732 HUMERUS DIVISION NEC     | 7785 PART OSTEECTOMY-FEMUR     |
| 7733 RADIUS/ULNA DIVISION NEC | 7786 PARTIAL PATELLECTOMY      |
| 7734 METACAR/CAR DIVISION NEC | 7787 PART OSTEECT-TIBIA/FIBULA |
| 7735 FEMORAL DIVISION NEC     | 7788 PART OSTEECT-METATAR/TAR  |
| 7736 PATELLAR DIVISION NEC    | 7789 PARTIAL OSTEECTOMY NEC    |
| 7737 TIBIA/FIBULA DIV NEC     | 7790 TOTAL OSTEECTOMY NOS      |
| 7738 METATAR/TAR DIVISION NEC | 7791 TOT CHEST CAGE OSTEECTOMY |
| 7739 BONE DIVISION NEC        | 7792 TOTAL OSTEECTOMY-HUMERUS  |
| 7740 BONE BIOPSY NOS          | 7793 TOT OSTEECT-RADIUS/ULNA   |
| 7741 CHEST CAGE BONE BIOPSY   | 7794 TOT OSTEECT-METACARP/CARP |
| 7742 HUMERUS BIOPSY           | 7795 TOT OSTEECTOMY-FEMUR      |
| 7743 RADIUS & ULNA BIOPSY     | 7796 TOTAL PATELLECTOMY        |
| 7744 METACARPAL/CARPAL BIOPSY | 7797 TOT OSTEECT-TIBIA/FIBULA  |
| 7745 FEMORAL BIOPSY           | 7798 TOT OSTEECT-METATARS/TARS |
| 7746 PATELLAR BIOPSY          | 7799 TOTAL OSTEECTOMY NEC      |
| 7747 TIBIA & FIBULA BIOPSY    | 7800 BONE GRAFT NOS            |
| 7748 METATARSAL/TARSAL BIOPSY | 7801 BONE GRAFT TO CHEST CAGE  |
| 7749 BONE BIOPSY NEC          | 7802 BONE GRAFT TO HUMERUS     |

|                               |                               |
|-------------------------------|-------------------------------|
| 7751 BUNIONECT/SFT/OSTEOTOMY  | 7803 BONE GRAFT-RADIUS/ULNA   |
| 7804 BONE GRFT TO METACAR/CAR | 7858 INT FIXATION-METATAR/TAR |
| 7805 BONE GRAFT TO FEMUR      | 7859 INT FIX-NO FX REDUCT NEC |
| 7806 BONE GRAFT TO PATELLA    | 7860 REMOVE IMP DEVICE NOS    |
| 7807 BONE GRAFT-TIBIA/FIBULA  | 7861 REMOV IMP DEV-CHEST CAGE |
| 7808 BONE GRAFT-METATAR/TAR   | 7862 REMOVE IMPL DEV-HUMERUS  |
| 7809 BONE GRAFT NEC           | 7863 REMOV IMP DEV-RADIUS/ULN |
| 7810 APPLIC EXT FIX DEV NOS   | 7864 REMOV IMP DEV-METAC/CARP |
| 7811 APPL EXT FIX-CHEST CAGE  | 7865 REMOVE IMP DEVICE-FEMUR  |
| 7812 APPLIC EXT FIX-HUMERUS   | 7866 REMOV IMP DEVICE-PATELLA |
| 7813 APPL EXT FIX-RADIUS/ULNA | 7867 REMOV IMP DEV-TIB/FIBULA |
| 7814 APPL EXT FIX-METACAR/CAR | 7868 REMOVE IMP DEV-METAT/TAR |
| 7815 APPLIC EXT FIX DEV-FEMUR | 7869 REMOVE IMPL DEVICE NEC   |
| 7816 APPL EXT FIX DEV-PATELLA | 7870 OSTEOCLASIS NOS          |
| 7817 APPL EXT FIX-TIB/FIBULA  | 7871 OSTEOCLASIS-CHEST CAGE   |
| 7818 APPL EXT FIX-METATAR/TAR | 7872 OSTEOCLASIS-HUMERUS      |
| 7819 APPLIC EXT FIX DEV NEC   | 7873 OSTEOCLASIS-RADIUS/ULNA  |
| 7820 LIMB SHORTEN PROC NOS    | 7874 OSTEOCLASIS-METACAR/CAR  |
| 7822 LIMB SHORT PROC-HUMERUS  | 7875 OSTEOCLASIS-FEMUR        |
| 7823 LIMB SHORTEN-RADIUS/ULNA | 7876 OSTEOCLASIS-PATELLA      |
| 7824 LIMB SHORTEN-METACAR/CAR | 7877 OSTEOCLASIS-TIBIA/FIBULA |
| 7825 LIMB SHORT PROC-FEMUR    | 7878 OSTEOCLASIS-METATAR/TAR  |
| 7827 LIMB SHORTEN-TIB/FIBULA  | 7879 OSTEOCLASIS NEC          |
| 7828 LIMB SHORTEN-METATAR/TAR | 7880 OTHER BONE DX PROC NOS   |
| 7829 LIMB SHORTEN PROC NEC    | 7881 OTH DX PROCED-CHEST CAGE |
| 7830 LIMB LENGTHEN PROC NOS   | 7882 OTH DX PROCED-HUMERUS    |
| 7831 LIMB LENGTHEN PROC NOS   | 7883 OTH DX PROC-RADIUS/ULNA  |
| 7832 LIMB LENGTH PROC-HUMERUS | 7884 OTH DX PROC-METACAR/CAR  |
| 7833 LIMB LENGTH-RADIUS/ULNA  | 7885 OTH DX PROCED-FEMUR      |
| 7834 LIMB LENGTH-METACAR/CAR  | 7886 OTH DX PROCED-PATELLA    |
| 7835 LIMB LENGTH PROC-FEMUR   | 7887 OTH DX PROC-TIBIA/FIBULA |
| 7837 LIMB LENGTHEN-TIB/FIBULA | 7888 OTH DX PROC-METATAR/TAR  |
| 7838 LIMB LENGTHN-METATAR/TAR | 7889 OTHER BONE DX PROC NEC   |
| 7839 LIMB LENGTHEN PROC NEC   | 7890 INSERT BONE STIMUL NOS   |
| 7840 OTH BONE REPAIR/PLAST OP | 7891 INSERT BONE STIMUL-CHEST |
| 7841 OTH CHEST CAGE REP/PLAST | 7892 INSERT BONE STIM-HUMERUS |
| 7842 OTH HUMERUS REPAIR/PLAST | 7893 INSER BONE STIM-RAD/ULNA |
| 7843 OTH RAD/ULN REPAIR/PLAST | 7894 INSER BONE STIM-META/CAR |
| 7844 OTH METAC/CARP REP/PLAST | 7895 INSERT BONE STIM-FEMUR   |
| 7845 OTH FEMUR REPAIR/PLASTIC | 7896 INSERT BONE STIM-PATELLA |
| 7846 OTH PATELLA REPAIR/PLAST | 7897 INSER BONE STIM-TIB/FIB  |
| 7847 OTH TIB/FIB REPAIR/PLAST | 7898 INSER BONE STIM-META/TAR |
| 7848 OTH META/TAR REPA/PLAST  | 7899 INSERT BONE STIMUL NEC   |
| 7849 OTH BONE REPA/PLAST NEC  | 7910 CL FX REDUC-INT FIX NOS  |
| 7850 INT FIX W/O FX REDUC NOS | 7911 CLOS RED-INT FIX HUMERUS |
| 7851 INT FIXATION-CHEST CAGE  | 7912 CL RED-INT FIX RAD/ULNA  |
| 7852 INT FIXATION-HUMERUS     | 7913 CL RED-INT FIX METAC/CAR |
| 7853 INT FIXATION-RADIUS/ULNA | 7914 CLOSE RED-INT FIX FINGER |
| 7854 INT FIXATION-METACAR/CAR | 7915 CLOSED RED-INT FIX FEMUR |
| 7855 INTERNAL FIXATION-FEMUR  | 7916 CL RED-INT FIX TIB/FIBU  |
| 7856 INTERNAL FIX-PATELLA     | 7917 CL RED-INT FIX METAT/TAR |

|                               |                               |
|-------------------------------|-------------------------------|
| 7857 INT FIXATION-TIBIA/FIBUL | 7918 CLOSE RED-INT FIX TOE FX |
| 7919 CL FX REDUC-INT FIX NEC  | 7988 OPN REDUC DISLOC-FT/TOE  |
| 7920 OPEN FX REDUCTION NOS    | 7989 OPEN REDUC-DISLOCAT NEC  |
| 7921 OPEN REDUC-HUMERUS FX    | 7990 UNSPEC OP BONE INJ NOS   |
| 7922 OPEN REDUC-RADIUS/ULN FX | 7991 HUMERUS INJURY OP NOS    |
| 7923 OPEN REDUC-METAC/CAR FX  | 7992 RADIUS/ULNA INJ OP NOS   |
| 7924 OPEN REDUCTION-FINGER FX | 7993 METACARP/CARP INJ OP NOS |
| 7925 OPEN REDUCTION-FEMUR FX  | 7994 FINGER INJURY OP NOS     |
| 7926 OPEN REDUC-TIBIA/FIB FX  | 7995 FEMUR INJURY OP NOS      |
| 7927 OPEN REDUC-METAT/TARS FX | 7996 TIBIA/FIBULA INJ OP NOS  |
| 7928 OPEN REDUCTION-TOE FX    | 7997 METATARS/TARS INJ OP NOS |
| 7929 OPEN FX REDUCTION NEC    | 7998 TOE INJURY OPERATION NOS |
| 7930 OPN FX RED W INT FIX NOS | 7999 UNSPEC OP-BONE INJ NEC   |
| 7931 OPEN RED-INT FIX HUMERUS | 8000 ARTHROT & PROS REMOV NOS |
| 7932 OP RED-INT FIX RAD/ULNA  | 8001 ARTHROT/PROS REMOV-SHLDR |
| 7933 OP RED-INT FIX METAC/CAR | 8002 ARTHROT/PROS REMOV-ELBOW |
| 7934 OPEN RED-INT FIX FINGER  | 8003 ARTHROT/PROS REMOV-WRIST |
| 7935 OPEN REDUC-INT FIX FEMUR | 8004 ARTHROT/PROS REMOV-HAND  |
| 7936 OP RED-INT FIX TIB/FIBUL | 8005 ARTHROT/PROS REMOV-HIP   |
| 7937 OP RED-INT FIX METAT/TAR | 8006 ARTHROT/PROS REMOV-KNEE  |
| 7938 OPEN REDUCT-INT FIX TOE  | 8007 ARTHROT/PROS REMOV-ANKLE |
| 7939 OPN FX RED W INT FIX NEC | 8008 ARTHROT/PROS REMOV-FOOT  |
| 7940 CLS REDUC-SEP EPIPHY NOS | 8009 ARTHROT & PROS REMOV NEC |
| 7941 CLOSE RED-HUMERUS EPIPHY | 8010 OTHER ARTHROTOMY NOS     |
| 7942 CLS RED-RADIUS/UL EPIPHY | 8011 OTH ARTHROTOMY-SHOULDER  |
| 7945 CLOSE REDUC-FEMUR EPIPHY | 8012 OTH ARTHROTOMY-ELBOW     |
| 7946 CLS RED-TIBIA/FIB EPIPHY | 8013 OTH ARTHROTOMY-WRIST     |
| 7949 CLS REDUC-SEP EPIPHY NEC | 8014 OTH ARTHROTOMY-HAND/FNGR |
| 7950 OPEN RED-SEP EPIPHY NOS  | 8015 OTH ARTHROTOMY-HIP       |
| 7951 OPN RED-SEP EPIPHY-HUMER | 8016 OTH ARTHROTOMY-KNEE      |
| 7952 OP RED-RADIUS/ULN EPIPHY | 8017 OTH ARTHROTOMY-ANKLE     |
| 7955 OPN RED-SEP EPIPHY-FEMUR | 8018 OTH ARTHROTOMY-FOOT/TOE  |
| 7956 OP RED-TIBIA/FIB EPIPHYS | 8019 OTHER ARTHROTOMY NEC     |
| 7959 OPEN RED-SEP EPIPHY NEC  | 8020 ARTHROSCOPY NOS          |
| 7960 OPEN FX SITE DEBRIDE NOS | 8021 SHOULDER ARTHROSCOPY     |
| 7961 DEBRID OPEN FX-HUMERUS   | 8022 ELBOW ARTHROSCOPY        |
| 7962 DEBRID OPN FX-RADIUS/ULN | 8023 WRIST ARTHROSCOPY        |
| 7963 DEBRID OPN FX-METAC/CAR  | 8024 HAND & FINGER ARTHROSCOP |
| 7964 DEBRID OPN FX-FINGER     | 8025 HIP ARTHROSCOPY          |
| 7965 DEBRID OPN FX-FEMUR      | 8026 KNEE ARTHROSCOPY         |
| 7966 DEBRID OPN FX-TIBIA/FIB  | 8027 ANKLE ARTHROSCOPY        |
| 7967 DEBRID OPN FX-METAT/TAR  | 8028 FOOT & TOE ARTHROSCOPY   |
| 7968 DEBRID OPN FX-TOE        | 8029 ARTHROSCOPY NEC          |
| 7969 OPEN FX SITE DEBRIDE NEC | 8040 JT STRUCTUR DIVISION NOS |
| 7980 OPEN REDUC-DISLOCAT NOS  | 8041 SHOULDER STRUCT DIVISION |
| 7981 OPN REDUC DISLOC-SHOULDR | 8042 ELBOW STRUCTURE DIVISION |
| 7982 OPEN REDUC-ELBOW DISLOC  | 8043 WRIST STRUCTURE DIVISION |
| 7983 OPEN REDUC-WRIST DISLOC  | 8044 HAND JOINT STRUCT DIVIS  |
| 7984 OPN REDUC DISLOC-HAND    | 8045 HIP STRUCTURE DIVISION   |
| 7985 OPEN REDUC-HIP DISLOCAT  | 8046 KNEE STRUCTURE DIVISION  |
| 7986 OPEN REDUC-KNEE DISLOCAT | 8047 ANKLE STRUCTURE DIVISION |

|                               |                                        |
|-------------------------------|----------------------------------------|
| 7987 OPEN REDUC-ANKLE DISLOC  | 8048 FOOT JOINT STRUCT DIVIS           |
| 8049 JT STRUCTUR DIVISION NEC | 8116 METATARSOPHALANGEAL FUS           |
| 805 JT STRUCTUR DIVISION NEC  | 8117 OTHER FUSION OF FOOT              |
| 8050 EXC/DEST INTVRT DISC NOS | 8118 OTHER FUSION OF FOOT              |
| 8051 EXCISION INTERVERT DISC  | 8120 ARTHRODESIS NOS                   |
| 8059 OTH EXC/DEST INTVRT DISC | 8121 ARTHRODESIS OF HIP                |
| 806 EXCIS KNEE SEMILUN CARTL  | 8122 ARTHRODESIS OF KNEE               |
| 8070 SYNOVECTOMY-SITE NOS     | 8123 ARTHRODESIS OF SHOULDER           |
| 8071 SHOULDER SYNOVECTOMY     | 8124 ARTHRODESIS OF ELBOW              |
| 8072 ELBOW SYNOVECTOMY        | 8125 CARPORADIAL FUSION                |
| 8073 WRIST SYNOVECTOMY        | 8126 METACARPOCARPAL FUSION            |
| 8074 HAND SYNOVECTOMY         | 8127 METACARPOPHALANGEAL FUS           |
| 8075 HIP SYNOVECTOMY          | 8128 INTERPHALANGEAL FUSION            |
| 8076 KNEE SYNOVECTOMY         | 8129 ARTHRODESIS NEC                   |
| 8077 ANKLE SYNOVECTOMY        | 8130 SPINAL REFUSION NOS               |
| 8078 FOOT SYNOVECTOMY         | 8131 REFUSION OF ATLAS-AXIS            |
| 8079 SYNOVECTOMY-SITE NEC     | 8132 REFUSION OF OTH CERV ANT          |
| 8080 DESTRUCT JOINT LES NOS   | 8133 REFUS OF OTH CERV POST            |
| 8081 DESTRUC-SHOULDER LES NEC | 8134 REFUSION OF DORSAL ANT            |
| 8082 DESTRUC-ELBOW LESION NEC | 8135 REFUSION OF DORSAL POST           |
| 8083 DESTRUC-WRIST LESION NEC | 8136 REFUSION OF LUMBAR ANT            |
| 8084 DESTRUC-HAND JT LES NEC  | 8137 REFUSION OF LUMBAR LAT            |
| 8085 DESTRUCT-HIP LESION NEC  | 8138 REFUSION OF LUMBAR POST           |
| 8086 DESTRUCT-KNEE LESION NEC | 8139 REFUSION OF SPINE NEC             |
| 8087 DESTRUC-ANKLE LESION NEC | 8140 REPAIR OF HIP, NEC                |
| 8088 DESTRUC-FOOT JT LES NEC  | 8141 REPAIR OF HIP, NEC                |
| 8089 DESTRUCT JOINT LES NEC   | 8142 FIVE-IN-ONE KNEE REPAIR           |
| 8090 EXCISION OF JOINT NOS    | 8143 TRIAD KNEE REPAIR                 |
| 8091 EXCISION OF SHOULDER NEC | 8144 PATELLAR STABILIZATION            |
| 8092 EXCISION OF ELBOW NEC    | 8145 CRUCIATE LIG REPAIR NEC           |
| 8093 EXCISION OF WRIST NEC    | 8146 COLLATERL LIG REPAIR NEC          |
| 8094 EXCISION HAND JOINT NEC  | 8147 OTHER REPAIR OF KNEE              |
| 8095 EXCISION OF HIP NEC      | 8148 OTHER REPAIR OF KNEE              |
| 8096 EXCISION OF KNEE NEC     | 8149 OTHER REPAIR OF ANKLE             |
| 8097 EXCISION OF ANKLE NEC    | 8151 TOTAL HIP REPLACEMENT             |
| 8098 EXCISION FOOT JOINT NEC  | 8152 PARTIAL HIP REPLACEMENT           |
| 8099 EXCISION OF JOINT NEC    | 8153 REVISE HIP REPLACEMENT            |
| 8100 SPINAL FUSION NOS        | 8154 TOTAL KNEE REPLACEMENT            |
| 8101 ATLAS-AXIS FUSION        | 8155 REVISE KNEE REPLACEMENT           |
| 8102 OTHER CERVICAL FUS ANT   | 8156 TOTAL ANKLE REPLACEMENT           |
| 8103 OTHER CERVICAL FUS POST  | 8157 REPL JOINT OF FOOT, TOE           |
| 8104 DORSAL/DORSOLUM FUS ANT  | 8159 REV JT REPL LOW EXT NEC           |
| 8105 DORSAL/DORSOLUM FUS POST | 8161 360 SPINAL FUSION                 |
| 8106 LUMBAR/LUMBOSAC FUS ANT  | 8162 FUS/REFUS 2-3 VERTEBRAE           |
| 8107 LUMBAR/LUMBOSAC FUS LAT  | 8163 FUS/REFUS 4-8 VERTEBRAE           |
| 8108 LUMBAR/LUMBOSAC FUS POST | 8164 FUS/REFUS 9 VERTEBRAE             |
| 8109 LUMBAR/LUMBOSAC FUS POST | 8165 VERTEBROPLASTY (OCT 04)           |
| 8111 ANKLE FUSION             | 8166 KYPHOPLASTY (OCT 04)              |
| 8112 TRIPLE ARTHRODESIS       | 8169 OTH HIP REPAIR JAN80--SEP89 `0/05 |
| 8113 SUBTALAR FUSION          | 8171 ARTHROPLAS METACARP WIT           |
| 8114 MIDTARSAL FUSION         | 8172 ARTHROPLASTY METACAR W/O          |

|                               |                               |
|-------------------------------|-------------------------------|
| 8115 TARSOMETATARSAL FUSION   | 8173 TOTAL WRIST REPLACEMENT  |
| 8174 ARTHROPLASTY CARPAL WIT  | 8269 THUMB RECONSTRUCTION NEC |
| 8175 ARTHROPLASTY CARPAL W/O  | 8271 HAND TEND PULLEY RECONST |
| 8179 OTH REPAIR HAN/FIN/WRIS  | 8272 PLAST OP HND-MUS/FAS GRF |
| 8180 TOTAL SHOULDER REPLACE   | 8279 PLAST OP HAND W GRFT NEC |
| 8181 PARTIAL SHOULDER REPLACE | 8281 TRANSFER OF FINGER       |
| 8182 REP RECUR SHLDER DISLOC  | 8282 REPAIR OF CLEFT HAND     |
| 8183 SHOULDER ARTHROPLAST NEC | 8283 REPAIR OF MACRODACTYLY   |
| 8184 TOTAL ELBOW REPLACEMENT  | 8284 REPAIR OF MALLET FINGER  |
| 8185 ELBOW ARTHROPLASTY NEC   | 8285 OTHER TENODESIS OF HAND  |
| 8186 ELBOW ARTHROPLASTY NEC   | 8286 OTHER TENOPLASTY OF HAND |
| 8187 ELBOW ARTHROPLASTY NEC   | 8289 HAND PLASTIC OP NEC      |
| 8193 SUTUR CAPSUL/LIGAMEN ARM | 8291 LYSIS OF HAND ADHESIONS  |
| 8194 SUTURE CAPSUL/LIG ANK/FT | 8299 HAND MUS/TEN/FAS/OPS NEC |
| 8195 SUTUR CAPSUL/LIG LEG NEC | 8301 TENDON SHEATH EXPLORAT   |
| 8196 OTHER REPAIR OF JOINT    | 8302 MYOTOMY                  |
| 8197 REV JT REPL UPPER EXTREM | 8303 BURSOTOMY                |
| 8198 OTHER JOINT DX PROCEDURE | 8309 SOFT TISSUE INCISION NEC |
| 8199 JOINT STRUCTURE OP NEC   | 8311 ACHILLOTENOTOMY          |
| 8201 EXPLOR TEND SHEATH-HAND  | 8312 ADDUCTOR TENOTOMY OF HIP |
| 8202 MYOTOMY OF HAND          | 8313 OTHER TENOTOMY           |
| 8203 BURSOTOMY OF HAND        | 8314 FASCIOTOMY               |
| 8209 INC SOFT TISSUE HAND NEC | 8319 SOFT TISSUE DIVISION NEC |
| 8211 TENOTOMY OF HAND         | 8321 SOFT TISSUE BIOPSY       |
| 8212 FASCIOTOMY OF HAND       | 8329 SOFT TISSUE DX PROC NEC  |
| 8219 DIV SOFT TISSUE HAND NEC | 8331 EXCIS LES TENDON SHEATH  |
| 8221 EXC LES TEND SHEATH HAND | 8332 EXCIS LESION OF MUSCLE   |
| 8222 EXCISION HAND MUSCLE LES | 8339 EXC LES SOFT TISSUE NEC  |
| 8229 EXC LES SFT TISS HND NEC | 8341 TENDON EXCISION FOR GRFT |
| 8231 BURSECTOMY OF HAND       | 8342 OTHER TENONECTOMY        |
| 8232 EXCIS HAND TEND FOR GRFT | 8343 MUSC/FASC EXCIS FOR GRFT |
| 8233 HAND TENONECTOMY NEC     | 8344 OTHER FASCIECTOMY        |
| 8234 EXC HND MUS/FAS FOR GRFT | 8345 OTHER MYECTOMY           |
| 8235 HAND FASCIECTOMY NEC     | 8349 OTHER SOFT TISSUE EXCIS  |
| 8236 OTHER MYECTOMY OF HAND   | 835 BURSECTOMY                |
| 8239 HAND SOFT TISSUE EXC NEC | 8361 TENDON SHEATH SUTURE     |
| 8241 SUTURE TENDN SHEATH HAND | 8362 DELAYED TENDON SUTURE    |
| 8242 DELAY SUT FLEX TEND HAND | 8363 ROTATOR CUFF REPAIR      |
| 8243 DELAY SUT HAND TEND NEC  | 8364 OTHER SUTURE OF TENDON   |
| 8244 SUTUR FLEX TEND HAND NEC | 8365 OTHER MUSCLE/FASC SUTURE |
| 8245 SUTURE HAND TENDON NEC   | 8371 TENDON ADVANCEMENT       |
| 8246 SUTURE HAND MUSCLE/FASC  | 8372 TENDON RECESSON          |
| 8251 HAND TENDON ADVANCEMENT  | 8373 TENDON REATTACHMENT      |
| 8252 HAND TENDON RECESSON     | 8374 MUSCLE REATTACHMENT      |
| 8253 HAND TENDON REATTACHMENT | 8375 TENDON TRNSFR/TRANSPLANT |
| 8254 HAND MUSCLE REATTACHMENT | 8376 OTHER TENDON TRANSPOSIT  |
| 8255 CHNG HND MUS/TEN LNG NEC | 8377 MUSCLE TRNSFR/TRANSPLANT |
| 8256 TRANSPLANT HAND TEND NEC | 8379 OTHER MUSCLE TRANSPOSIT  |
| 8257 TRANSPOSIT HAND TEND NEC | 8381 TENDON GRAFT             |
| 8258 TRANSPLANT HAND MUSC NEC | 8382 MUSCLE OR FASCIA GRAFT   |
| 8259 TRANSPOSIT HAND MUSC NEC | 8383 TENDON PULLEY RECONSTRUC |

|                                       |                                      |
|---------------------------------------|--------------------------------------|
| 8261 POLLICIZATION OPERATION          | 8384 CLUBFOOT RELEASE NEC            |
| 8385 MUSC/TEND LNG CHANGE NEC         | 8467 REVISE DISC PROST THORA 10/04   |
| 8386 QUADRICEPSPLASTY                 | 8468 REVISE DISC PROSTH LUMB 10/04   |
| 8387 OTHER PLASTIC OPS MUSCLE         | 8469 REVISE DISC PROSTH NOS (OCT 04) |
| 8388 OTHER PLASTIC OPS TENDON         | 8472 APP EXT FIX DEV-RING SYS OCT05- |
| 8389 OTHER PLASTIC OPS FASCIA         | 8473 APP HYBRID EXT FIX DEV OCT05-   |
| 8391 ADHESIOLYSIS MUS/TEN/FAS         | 8491 AMPUTATION NOS                  |
| 8392 INSERT SKEL MUSC STIMULA         | 8492 SEPARAT EQUAL JOIN TWIN         |
| 8393 REMOV SKEL MUSC STIMULAT         | 8493 SEPARAT UNEQUL JOIN TWIN        |
| 8399 MUS/TEN/FAS/BUR OP NEC           | 8499 MUSCULOSKELETAL OP NEC          |
| 8400 UPPER LIMB AMPUTAT NOS           | 8512 OPEN BREAST BIOPSY              |
| 8401 FINGER AMPUTATION                | 8520 BREAST TISSU DESTRUC NOS        |
| 8402 THUMB AMPUTATION                 | 8521 LOCAL EXCIS BREAST LES          |
| 8403 AMPUTATION THROUGH HAND          | 8522 QUADRANT RESECT BREAST          |
| 8404 DISARTICULATION OF WRIST         | 8523 SUBTOTAL MASTECTOMY             |
| 8405 AMPUTATION THRU FOREARM          | 8524 EXC ECTOPIC BREAST TISSU        |
| 8406 DISARTICULATION OF ELBOW         | 8525 EXCISION OF NIPPLE              |
| 8407 AMPUTATION THRU HUMERUS          | 8531 UNILAT REDUCT MAMMOPLAST        |
| 8408 SHOULDER DISARTICULATION         | 8532 BILAT REDUCT MAMMOPLASTY        |
| 8409 FOREQUARTER AMPUTATION           | 8533 UNIL SUBQ MAMMECT-IMPLNT        |
| 8410 LOWER LIMB AMPUTAT NOS           | 8534 UNILAT SUBQ MAMMECT NEC         |
| 8411 TOE AMPUTATION                   | 8535 BIL SUBQ MAMMECT-IMPLANT        |
| 8412 AMPUTATION THROUGH FOOT          | 8536 BILAT SUBQ MAMMECTOM NEC        |
| 8413 DISARTICULATION OF ANKLE         | 8541 UNILAT SIMPLE MASTECTOMY        |
| 8414 AMPUTAT THROUGH MALLEOLI         | 8542 BILAT SIMPLE MASTECTOMY         |
| 8415 BELOW KNEE AMPUTAT NEC           | 8543 UNILAT EXTEN SIMP MASTEC        |
| 8416 DISARTICULATION OF KNEE          | 8544 BILAT EXTEND SIMP MASTEC        |
| 8417 ABOVE KNEE AMPUTATION            | 8545 UNILAT RADICAL MASTECTOM        |
| 8418 DISARTICULATION OF HIP           | 8546 BILAT RADICAL MASTECTOMY        |
| 8419 HINDQUARTER AMPUTATION           | 8547 UNIL EXT RAD MASTECTOMY         |
| 8421 THUMB REATTACHMENT               | 8548 BIL EXTEN RAD MASTECTOMY        |
| 8422 FINGER REATTACHMENT              | 8550 AUGMENT MAMMOPLASTY NOS         |
| 8423 FOREARM/WRIST/HAND REATT         | 8553 UNILAT BREAST IMPLANT           |
| 8424 UPPER ARM REATTACHMENT           | 8554 BILATERAL BREAST IMPLANT        |
| 8425 TOE REATTACHMENT                 | 856 MASTOPEXY                        |
| 8426 FOOT REATTACHMENT                | 857 TOTAL BREAST RECONSTRUCT         |
| 8427 LOWER LEG/ANKLE REATTACH         | 8582 BREAST SPLIT-THICK GRAFT        |
| 8428 THIGH REATTACHMENT               | 8583 BREAST FULL-THICK GRAFT         |
| 8429 REATTACHMENT NEC                 | 8584 BREAST PEDICLE GRAFT            |
| 843 AMPUTATION STUMP REVIS            | 8585 BREAST MUSCLE FLAP GRAFT        |
| 8440 IMPLNT/FIT PROS LIMB NOS         | 8586 TRANSPOSITION OF NIPPLE         |
| 8444 IMPLANT ARM PROSTHESIS           | 8587 NIPPLE REPAIR NEC               |
| 8448 IMPLANT LEG PROSTHESIS           | 8589 MAMMOPLASTY NEC                 |
| 8458 IMP INTRSPINE DECOMP DEV OCT05-  | 8593 BREAST IMPLANT REVISION         |
| 8459 INSERT OTH SPIN DEVICE           | 8594 BREAST IMPLANT REMOVAL          |
| 8460 INSERT DISC PROS NOS (OCT 04)    | 8595 INSER BREAST TISSU EXPAN        |
| 8461 INS PART DISC PROS CERV (OCT 04) | 8596 REMOV BREAST TISSU EXPAN        |
| 8462 INS TOT DISC PROST CERV (OCT 04) | 8599 BREAST OPERATION NEC            |
| 8463 INS SPIN DISC PROS THOR (OCT 04) | 8606 INSERT INFUSION PUMP            |
| 8464 INS PART DISC PROS LUMB (OCT 04) | 8621 EXCISION OF PILONID CYST        |
| 8465 INS TOTL DISC PROS LUMB (OCT 04) | 8622 EXC WOUND DEBRIDEMENT           |



|                                      |                                       |
|--------------------------------------|---------------------------------------|
| 8466 REVISE DISC PROST CERV (OCT 04) | 8682 FACIAL RHYTIDECTOMY              |
| 864 RADICAL EXCIS SKIN LES           | 8683 SIZE REDUCT PLASTIC OP           |
| 8660 FREE SKIN GRAFT NOS             | 8684 RELAXATION OF SCAR               |
| 8661 FULL-THICK HAND SKIN GRF        | 8685 SYNDACTYLY CORRECTION            |
| 8662 HAND SKIN GRAFT NEC             | 8686 ONYCHOPLASTY                     |
| 8663 FULL-THICK SKIN GRFT NEC        | 8689 SKIN REPAIR & PLASTY NEC         |
| 8665 HETEROGRAFT TO SKIN             | 8691 SKIN EXCISION FOR GRAFT          |
| 8666 HOMOGRAFT TO SKIN               | 8693 INSERT TISSUE EXPANDER           |
| 8667 DERMAL REGENER GRAFT            | 8694 INS/REPL SINGLE PUL GEN (OCT 04) |
| 8669 FREE SKIN GRAFT NEC             | 8695 INS/REPL DUAL PULSE GEN (OCT 04) |
| 8670 PEDICLE GRAFT/FLAP NOS          | 8696 INSERT/REPL OTH NEUROST 10/04    |
| 8671 CUT & PREP PEDICLE GRAFT        | 8697 INS/REP 1 PUL GEN OCT05-         |
| 8672 PEDICLE GRAFT ADVANCEMEN        | 8698 INS/REP 2 PUL GEN OCT05-         |
| 8673 ATTACH PEDICLE TO HAND          | 8753 INTRAOPER CHOLANGIOGRAM          |
| 8674 ATTACH PEDICLE GRAFT NEC        | 9504 ANESTHETIZED EYE EXAM            |
| 8675 REVISION OF PEDICLE GRFT        | 8625 DERMABRASION                     |
| 8681 REPAIR FACIAL WEAKNESS          |                                       |
